# Supplementary material for: BINOL-like atropisomeric chiral nanographene
Source: Royal Society of Chemistry journal article supplement (doi:10.1039/d2sc06244e), 2023-01-01
Supplement: d2sc06244e1.pdf [file d2sc06244e1.pdf]

Supplementary Information for

**BIONL-like Atropoisomeric Chiral Nanographene**

*Sheng-Tao Li,<sup>1</sup> Ranran Li,<sup>1</sup> Yi-Kang Zhang,<sup>1</sup> Shutao Wang,<sup>2</sup> Bin Ma,<sup>1</sup> Bin Zhang,<sup>1</sup> and Peng An<sup>\*1</sup>*

<sup>1</sup>School of Chemical Science and Technology, Yunnan University, Kunming 650500, P. R. China

<sup>2</sup>College of Chemistry and Chemical Engineering, Lanzhou University, Lanzhou 730000, P. R. China

**Table of Contents**

|                                                                                                                        |     |
|------------------------------------------------------------------------------------------------------------------------|-----|
| <b>General Information</b> .....                                                                                       | S2  |
| <b>Synthesis</b> .....                                                                                                 | S2  |
| Scheme S1 Synthesis of oxa-nanographene <b>1</b> .....                                                                 | S2  |
| <b>Supplementary Figures and Tables</b>                                                                                |     |
| Figure S1. X-ray crystallography of compound <b>1</b> .....                                                            | S7  |
| Table S1. Details of the crystal structure analyses of compound <b>1</b> .....                                         | S8  |
| Figure S2 Optical resolution of compound <b>1</b> .....                                                                | S9  |
| Figure S3 Figure S3. Thermal isomerization study of <b>1-R</b> .....                                                   | S10 |
| Figure S4. UV-vis spectroscopy of compounds <b>1</b> and <b>6</b> .....                                                | S13 |
| Figure S5. Fluorescence emission and decay of compounds <b>1</b> and <b>6</b> and CPL spectra of <b>1-R/S</b><br>..... | S14 |
| Table S2. Summary of the photophysical properties of compounds <b>1</b> and <b>6</b> .....                             | S14 |
| Figure S6. Photoinduced ROS study by monitoring the fluorescence of DCFH-DA. ....                                      | S15 |
| Figure S7. Photoinduced ROS study by monitoring the absorption of DPBF. ....                                           | S16 |
| Figure S8. Cyclic voltammograms of compounds <b>6</b> and <b>1</b> . ....                                              | S17 |
| Figure S9–S12. Spectra of <sup>1</sup> H NMR and <sup>13</sup> C NMR .....                                             | S18 |
| Figure S13. 2D H-H COSY spectrum of compound <b>1</b> .....                                                            | S22 |
| Figure S14. Partial 2D ROESY spectrum of compound <b>1</b> .....                                                       | S23 |
| Figure S15. HR MALDI-TOF mass spectrum and isotopic distribution pattern of oxa-NG <b>1</b> .                          | S24 |
| <b>Computational Details</b> .....                                                                                     | S25 |
| Figure S16. Computed racemization process of the NG- <b>1</b> at the M06-2X/6-31G** level.....                         | S25 |
| Figure S17–S19. Optimized structures of <b>1-R</b> , <b>1-S</b> , and <b>TS</b> .....                                  | S26 |
| Table S3–S5. Atomic coordinates for the DFT-optimized structures of <b>1-R</b> , <b>1-S</b> , and <b>TS</b> .....      | S26 |
| Figure S20. Calculated ECD spectrum of <b>1-R</b> and <b>1-S</b> .....                                                 | S43 |
| Figure S21. Calculated molecular orbitals of compounds <b>1</b> and <b>2</b> with energies. ....                       | S44 |
| Table S6. Major transitions of compound <b>1</b> calculated by TD-DFT .....                                            | S45 |
| <b>References</b> .....                                                                                                | S47 |

## General Information

Solvents and chemicals were purchased from commercial sources and used directly without further purification. Molecular sieves were activated in an oven and solvents for reaction was stored with molecular sieves. Petroleum ether (PE) used had a boiling range of 60–90 °C. Reactions were monitored by TLC on silica gel GF 254 plates. Column chromatography was generally performed through silica gel (200–300 mesh). All reactions were run open to air unless specifically described. NMR spectra were recorded with Bruker-400, 500 or 600 MHz spectrometers. Unless specified otherwise, the NMR spectra were recorded at 22 °C; they were calibrated using the residual solvent signal(<sup>1</sup>H) or solvent signal (<sup>13</sup>C). Chemical shifts were reported in parts per million (ppm). Chemical shifts were reported in ppm using TMS or deuterated solvents as internal standards (for <sup>1</sup>H NMR: CDCl<sub>3</sub>, 7.26, C<sub>6</sub>D<sub>6</sub>, 7.15; for <sup>13</sup>C NMR: CDCl<sub>3</sub>, 77.0, C<sub>6</sub>D<sub>6</sub>, 128.6). Multiplicity was reported as follows: s = singlet, d = doublet, t = triplet, q = quartet, m = multiplet, brs = broad. Coupling constants (J) are reported in Hertz (Hz). UV-Vis absorption spectra were recorded using a 1-cm quartz cuvette on a Shimadzu-UV-2600 spectrometer. Fluorescence spectra were recorded using a 1-cm quartz cuvette or powder form on a Gangdong F-320 spectrofluorometer at 25 °C. High-resolution mass spectrometry was performed on a Thermo LTQ-Orbitrap XL mass spectrometer equipped with collision cells for collision induced dissociation or Bruker MALDI-TOF MS RapifleX with DCTB(*trans*-2-[3-(4-*t*-butylphenyl)-2-methyl-2-propenylidene]malononitrile) as the matrix. Crystallographic data were collected on a Bruker D8 VENTURE diffractometer.

## Synthesis

### Scheme S1. Synthesis of nanographene **1**.

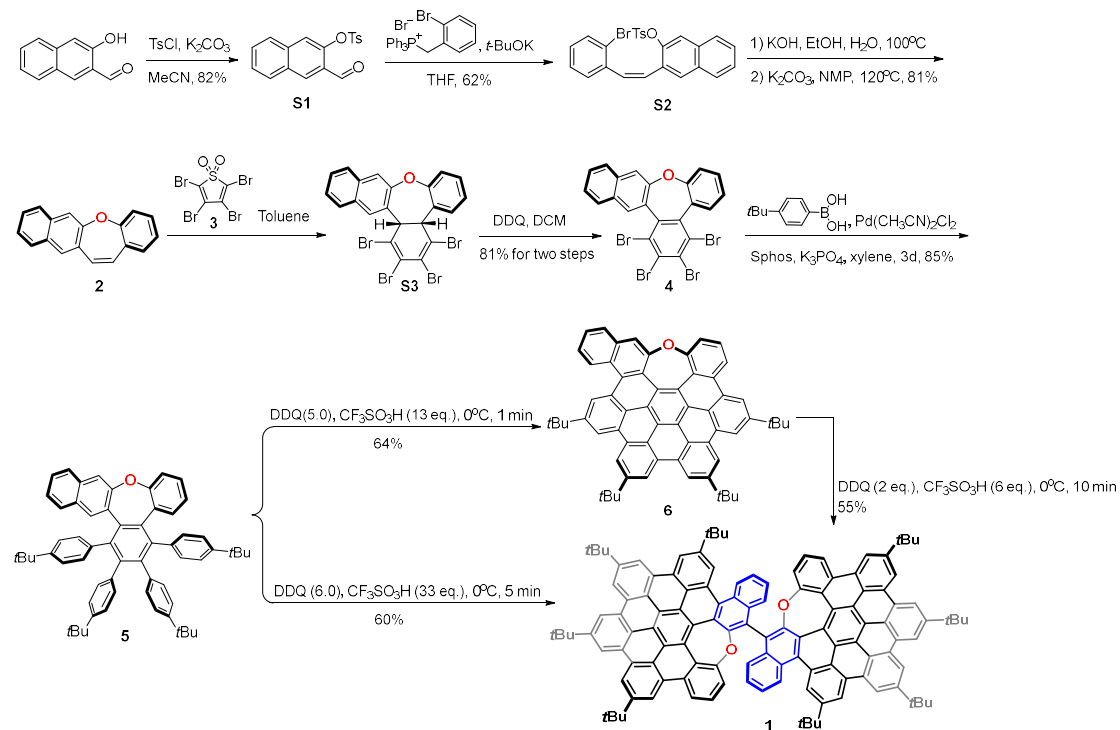

**3-Formylnaphthalen-2-yl 4-methylbenzenesulfonate (S1):** To a solution of 3-hydroxy-2-naphthaldehyde (861 mg, 5.0 mmol, 1.0 equiv) in anhydrous acetonitrile 50 mL was added potassium carbonate (1.38 g, 10.0 mmol, 2.0 equiv). The 4-methylbenzenesulfonyl chloride (1.14 g, 6.0 mmol, 1.2 equiv) was added to the above suspension and the mixture was stirred at 80 °C overnight. Upon complete conversion (checked by TLC), The mixture was filtered through a thin pad of silica gel, and the filtrate was concentrated to give a colorless solid (1.3 g, 82%) and directly used in the following step without further purification.

**(Z)-3-(2-Bromostyryl)naphthalen-2-yl 4-methylbenzenesulfonate (S2):** To a suspension of (2-bromobenzyl) triphenylphosphonium bromide (1.54 g, 3.0 mmol, 1.2 equiv) in anhydrous tetrahydrofuran 30 mL at 0 °C was added potassium *tert*-butoxide (404 mg, 3.6 mmol, 1.4 equiv) under Ar. The mixture was allowed to stir at room temperature for 30 mins followed by adding **S1** (815 mg, 2.5 mmol, 1.0 equiv) and the mixture were stirred at room temperature overnight. Upon complete conversion (checked by TLC), the mixture was quenched with water and extracted with EtOAc. The organic phase was collected, concentrated and purified by silica gel flash chromatography using ethyl acetate/petroleum ether as eluent to give the title product as a colorless solid (742 mg, 62%) and the NMR data was identical as the reported results<sup>[S1]</sup>. <sup>1</sup>H NMR (400 MHz, CDCl<sub>3</sub>) δ 7.83 (d, *J* = 8.0 Hz, 2H), 7.73 (dd, *J* = 8.0,

0.5 Hz, 1H), 7.70 (s, 1H), 7.59 (dd,  $J = 8.0, 1.0$  Hz, 1H), 7.47–7.42 (m, 3H), 7.36 (td,  $J = 8.0, 1.0$  Hz, 1H), 7.30 (d,  $J = 8.0$  Hz, 2H), 7.02 (td,  $J = 8.0, 1.0$  Hz, 1H), 7.59 (dd,  $J = 8.0, 1.0$  Hz, 1H), 6.88 (dd,  $J = 8.0, 0.5$  Hz, 1H), 6.75 (dd,  $J = 8.0, 1.0$  Hz, 1H), 6.69 (d,  $J = 12.0$  Hz, 1H), 6.66 (d,  $J = 12.0$  Hz, 1H), 2.40 (s, 3H).

**Benzo[b]naphtho[2,3-f]oxepine (2):** To a solution of **S2** (479 mg, 1.0 mmol, 1.0 equiv) in mixed solvents of water (15 mL) and ethanol (15 mL) was added potassium hydroxide (1.12 g, 20 mmol, 20.0 equiv) and the mixture was stirred under reflux for around 1 h. The reaction mixture was allowed to cool to room temperature. Hydrochloric acid (10%) was added to adjust the pH to 4 and dichloromethane was added to extract the product. The organic phase was washed with aqueous NaHCO<sub>3</sub> solution and dried over anhydrous Na<sub>2</sub>SO<sub>4</sub>. After the solvent was evaporated, the residue was mixed with K<sub>2</sub>CO<sub>3</sub> (690 mg, 5.0 mmol, 5.0 equiv) in NMP (10.0 mL). The mixture was heated at 120 °C for 20 h. The reaction mixture was quenched with water and then extracted with EtOAc, dried over anhydrous Na<sub>2</sub>SO<sub>4</sub>. The organic phase was concentrated and purified by silica gel column chromatography using ethyl acetate/ petroleum ether as eluent to give the title product as a colorless solid (198 mg, 81%) and the NMR data was identical as the reported results<sup>[S1]</sup>: <sup>1</sup>H NMR (400 MHz, CDCl<sub>3</sub>)  $\delta$  7.75 (d,  $J = 8.0$  Hz, 2H), 7.61 (d,  $J = 12.0$ , 2H), 7.44–7.36 (m, 2H), 7.31–7.25 (m, 2H), 7.19 (dd,  $J = 4.0, 0.5$  Hz, 1H), 7.14–7.10 (m, 1H), 6.86 (d,  $J = 10.0$ , 1H), 6.70 (d,  $J = 10.0$ , 1H).

**1,2,3,4-Tetrabromodibenzo[b,d]naphtho[2,3-f]oxepine (4):** A mixture of oxepine **2** (244 mg, 1.0 mmol, 1.0 equiv), tetrabromothiophene-S,S-dioxide 7<sup>[S2]</sup> (647 mg, 1.5 mmol, 1.5 equiv) in toluene (5 mL) in the sealed tube were heated to 110–120 °C until no oxepine **2** left (around 20 hours, checked by TLC: silica, PE: DCM = 2:1, UV/PMA). Then the solvent was removed in vacuo and the residue was dissolved in dichloromethane (15 mL) and 2,3-Dichloro-5,6-dicyano-1,4-benzoquinone (454 mg, 2.0 mmol, 2.0 equiv) was added and the mixture was stirred at room temperature for around 30 mins. The reaction mixture was concentrated. The residue was purified by silica gel flash chromatography (20–40% DCM in PE) to give the compound **4** (494 mg, 81% for two steps) as colorless solid: <sup>1</sup>H NMR (400 MHz, CDCl<sub>3</sub>)  $\delta$  8.16 (d,  $J = 6.0$  Hz, 2H), 7.81 (t,  $J = 8.0$  Hz, 2H), 7.68 (d,  $J = 8.0$  Hz, 1H), 7.67 (s, 1H), 7.50 (td,  $J = 8.0, 0.5$  Hz, 1H), 7.44 (t,  $J = 8.0$  Hz, 1H), 7.32 (d,  $J = 6.0$  Hz, 2H), 7.15–7.11 (m, 1H); <sup>13</sup>C NMR (101 MHz, CDCl<sub>3</sub>)  $\delta$  160.72, 159.46, 138.42, 138.22, 134.22, 134.04, 133.28, 131.07, 130.76, 130.64, 130.45, 130.25, 129.76, 128.34, 127.52, 127.12, 126.47, 125.78, 123.96, 120.51, 116.24; HRMS (MALDI-TOF) calcd for C<sub>22</sub>H<sub>10</sub>Br<sub>4</sub>O 607.7445 [M<sup>+</sup>], found 607.7447.

**1,2,3,4-Tetrakis(4-(tert-butyl)phenyl)dibenzo[b,d]naphtho[2,3-f]oxepine (5):** To a solution of oxepine **4** (153 mg, 0.25 mmol, 1.0 equiv) in xylene (4.0 mL) was quickly added 4-*tert*-butyllphenylboronic acid (890 mg, 5.0 mmol, 20.0 equiv), palladium(II) chloride diacetonitrile complex (13 mg, 0.05 mmol, 0.2 equiv), 2-dicyclohexylphosphino-2,6-dimethoxy-1,1-biphenyl (SPhos, 41 mg, 0.1 mmol, 0.4 equiv) and potassium phosphate tribasic (795 mg, 3.75 mmol, 15.0 equiv) under argon atmosphere.

Then the mixture was carefully gas exchanged to keep stirring under argon at 150 °C for around 72 h. The mixture was extracted thrice with dichloromethane, the combined organic layers were dried over Na<sub>2</sub>SO<sub>4</sub> and the solvent was removed under reduced pressure. The residue was purified by flash chromatography (silica, 20–40 % DCM in PE, UV) to give the compound **5** (175 mg, 85%) as white solid: m. p. 56–58 °C; <sup>1</sup>H NMR (400 MHz, CDCl<sub>3</sub>) δ 7.67 (d, *J* = 8.0 Hz, 1H), 7.65 (s, 1H), 7.34–7.27 (m, 5H), 7.20–6.98 (m, 5H), 6.90–6.87 (m, 2H), 6.70–6.64 (m, 4H), 6.54 (t, *J* = 8.0 Hz, 2H), 6.61–6.37 (m, 2H); <sup>13</sup>C NMR (100 MHz, CDCl<sub>3</sub>) δ 161.13, 160.79, 148.22, 147.91, 147.72, 147.69, 142.99, 142.72, 141.39, 140.80, 137.92, 137.76, 137.70, 137.65, 135.06, 134.98, 134.58, 133.85, 132.86, 132.73, 132.43, 131.55, 131.50, 131.48, 130.71, 130.44, 130.29, 130.25, 130.22, 129.99, 128.27, 127.95, 126.47, 126.11, 124.48, 123.74, 123.55, 123.49, 123.38, 122.49, 119.72, 115.27, 34.19, 34.11, 34.07, 31.26, 31.18, 31.16, 31.06; HRMS (ESI) calcd for C<sub>62</sub>H<sub>62</sub>NaO 845.4693 [M+Na<sup>+</sup>], found 845.4686.

**2,5,17,20-Tetra-tert-butyl-10-oxabenz[e]benzo[5',6']tetraceno[1',12',11',10':5,6,7,8,9]tetrapheno[10,11,12,1-nopqab]pleiadene (6):** To a solution of compound **5** (82 mg, 0.1 mmol, 1.0 equiv) in anhydrous dichloromethane (50 mL) in oven-dried flask with a magnetic stirring bar was added 2,3-dichloro-5,6-dicyano-1,4-benzoquinone (112 mg, 0.5 mmol, 5.0 equiv). The mixture was carefully exchanged into an argon atmosphere and stirred in an ice-water bath. Then trifluoromethanesulfonic acid (0.1 mL, 1.3 mmol, 13 equiv) was added dropwise to the above reaction mixture and the mixture was stirred at 0 °C for around 1 min. Triethyl amine (1.0 mL, 7.2 mmol, 72 equiv) was added, followed by methanol (1.0 mL, 24.7 mmol, 247 equiv) to quench the reaction and the mixture was concentrated under reduced pressure. The residue was purified by flash chromatography (silica, 20–40 % DCM in PE, UV) to give the titled compound **6** (52 mg, 64%) as yellow solid: m. p. 61–63 °C; <sup>1</sup>H NMR (400 MHz, CDCl<sub>3</sub>) δ 9.30 (s, 1H), 9.29 (s, 1H), 9.28 (s, 1H), 9.25 (s, 1H), 9.23 (s, 1H), 9.10 (s, 1H), 9.04 (s, 1H), 8.95 (s, 1H), 8.94 (d, *J* = 6.0 Hz, 1H), 8.76 (dd, *J* = 6.0, 2.0 Hz, 1H), 8.12 (dd, *J* = 6.0, 2.0 Hz, 1H), 7.97 (s, 1H), 7.90–7.85 (m, 2H), 7.67–7.62 (m, 2H), 1.83 (s, 9H), 1.82 (s, 9H), 1.72 (s, 9H), 1.72 (s, 9H); <sup>13</sup>C NMR (100 MHz, CDCl<sub>3</sub>) δ 158.73, 154.22, 149.68, 149.64, 149.20, 133.96, 133.43, 130.57, 130.44, 130.41, 130.32, 130.28, 130.25, 128.78, 128.65, 128.55, 127.36, 127.06, 126.88, 126.39, 125.51, 125.02, 124.95, 124.66, 123.71, 123.53, 123.32, 123.20, 122.39, 121.29, 120.86, 120.36, 120.23, 119.26, 119.00, 118.85, 118.80, 118.63, 118.55, 118.48, 114.49, 35.75, 35.72, 35.58, 31.99, 31.97, 31.84; HRMS (MALDI-TOF) calcd for C<sub>62</sub>H<sub>52</sub>O 813.4048 [M<sup>+</sup>], found 813.4036.

**2,2',5,5',17,17',20,20'-Octa-tert-butyl-11,11'-bi(10,10'-dioxabenz[e]benzo[5',6']tetraceno[1',12',11',10':5,6,7,8,9]tetrapheno[10,11,12,1-nopqab]pleiadene) (1):** From monomer **6**: to a solution of compound **6** (90 mg, 0.11 mmol, 1.0 equiv) in anhydrous dichloromethane (10 mL) in oven-dried flask with a magnetic stirring bar was added 2,3-dichloro-5,6-dicyano-1,4-benzoquinone (50 mg, 0.22 mmol, 2.0 equiv). The mixture was carefully exchanged into an argon atmosphere and stirred in an ice-water bath. Then

trifluoromethanesulfonic acid (0.05 mL, 0.65 mmol, 6.0 equiv) was added dropwise to the above reaction mixture and the mixture was stirred at 0 °C for around 5 min. Triethyl amine (0.5 mL, 3.6 mmol, 32 equiv) was added to quench the reaction and the mixture was concentrated under reduced pressure. The residue was purified by flash chromatography (silica, 20–40 % DCM in PE, UV) then recrystallization to give the titled compound **1** (49 mg, 55%) as yellow solid. From compound 5: to a solution of compound **5** (82 mg, 0.1 mmol, 1.0 equiv) in anhydrous dichloromethane (20 mL) in an oven-dried flask with a magnetic stirring bar was added 2,3-dichloro-5,6-dicyano-1,4-benzoquinone (137 mg, 0.6 mmol, 6.0 equiv). The mixture was carefully exchanged to an argon atmosphere and stirred in an ice-water bath. Then trifluoromethanesulfonic acid (0.25 mL, 3.25 mmol, 32.5 equiv) was added dropwise to the above reaction mixture and the mixture was stirred at 0 °C for around 2–3 min. Triethyl amine (0.5 mL, 3.6 mmol, 36 equiv) was added to quench the reaction and the mixture was concentrated under reduced pressure. The residue was purified by flash chromatography (silica, 20–40 % DCM in PE, UV) then recrystallization to give the titled compound **1** (54 mg, 60%) as yellow solid: m. p. 130–132 °C; <sup>1</sup>H NMR (400 MHz, CDCl<sub>3</sub>) δ 9.60 (s, 2H), 9.38 (s, 2H), 9.37 (s, 4H), 9.34 (s, 2H), 9.21 (d, *J* = 8.0 Hz, 2H), 9.14 (s, 2H), 9.09 (s, 2H), 9.89 (s, 2H), 8.44 (br, 2H), 8.07 (d, *J* = 8.0 Hz, 2H), 7.76 (t, *J* = 8.0 Hz, 2H), 7.55 (t, *J* = 8.0 Hz, 2H), 6.80 (br, 2H), 6.08 (d, *J* = 8.0 Hz, 2H), 1.91 (s, 18H), 1.88 (s, 18H), 1.86 (s, 18H), 1.78 (s, 18H); <sup>13</sup>C NMR (100 MHz, CDCl<sub>3</sub>) δ 157.45, 149.71, 149.62, 149.48, 149.25, 132.78, 130.68, 130.63, 130.50, 130.41, 130.37, 130.05, 129.01, 128.92, 128.60, 127.48, 127.02, 126.51, 125.43, 125.04, 123.72, 123.63, 123.57, 123.30, 123.24, 122.82, 122.63, 121.74, 121.36, 121.02, 120.45, 119.87, 119.49, 119.30, 119.03, 118.91, 118.81, 118.67, 118.41, 35.89, 35.81, 35.73, 35.56, 32.04, 31.99, 31.95, 31.88; HRMS (MALDI-TOF) calcd for C<sub>124</sub>H<sub>102</sub>O<sub>2</sub> 1622.7874 [M<sup>+</sup>], found 1622.7792.

(a)

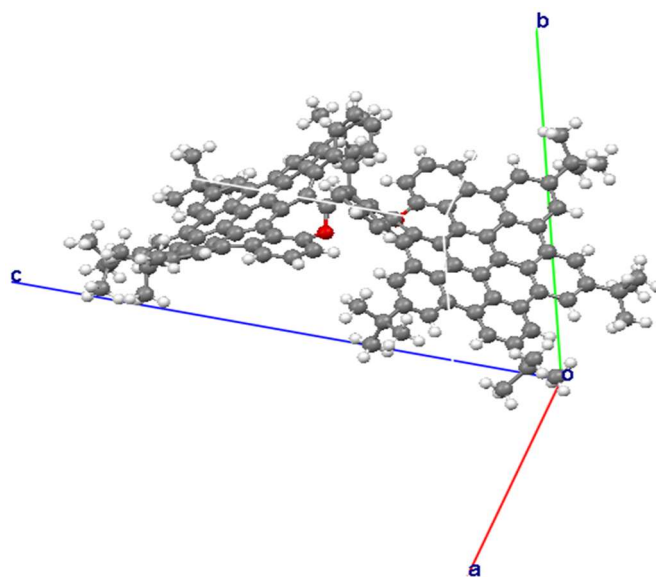

(b)

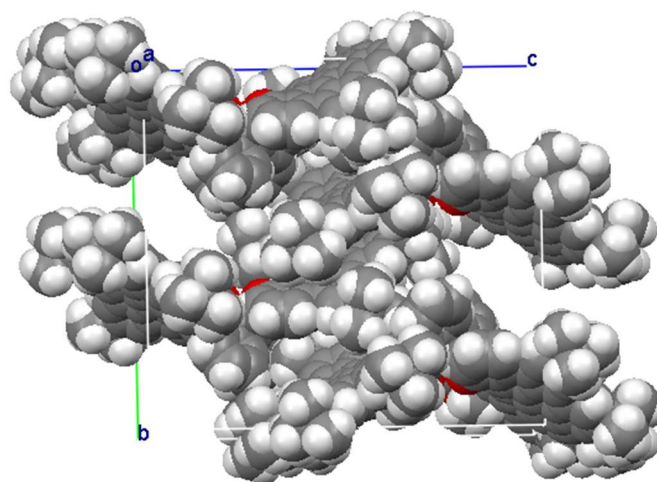

**Figure S1.** Single crystals suitable for X-ray diffraction analysis were obtained from solutions of **1** with 50% thermal ellipsoid probability. a) Crystal structure of compound **1** showing cell axes; b) Crystal packing as a space-filling model, along a, b, and c axes, respectively.

**Table S1.** Details of the Crystal Structure Analyses of Compound **1**.

|                                                   | Single crystal of <b>1</b>                       |
|---------------------------------------------------|--------------------------------------------------|
| CCDC No.                                          | 2193890                                          |
| empirical formula                                 | C <sub>124</sub> H <sub>102</sub> O <sub>2</sub> |
| formula wt                                        | 1624.05                                          |
| crystal description                               | yellow block                                     |
| crystal system                                    | Monoclinic                                       |
| space group                                       | C12/c1                                           |
| T (K)                                             | 150                                              |
| <i>a</i> (Å)                                      | 16.1038(17)                                      |
| <i>b</i> (Å)                                      | 24.540(3)                                        |
| <i>c</i> (Å)                                      | 26.560(2)                                        |
| $\alpha$ (°)                                      | 90                                               |
| $\beta$ (°)                                       | 90.069(4)                                        |
| $\gamma$ (°)                                      | 90                                               |
| <i>V</i> (Å <sup>3</sup> )                        | 10455.2(18)                                      |
| <i>Z</i>                                          | 4                                                |
| $\rho$ <sub>calcd</sub> (mg/m <sup>3</sup> )      | 1.032                                            |
| $\mu$ (mm <sup>-1</sup> )                         | 0.059                                            |
| $\theta$ range (°)                                | 2.08–24.998                                      |
| <i>F</i> (000)                                    | 3448                                             |
| collected reflens no.                             | 35100                                            |
| unique reflens no.                                | 8885                                             |
| <i>R</i> [ <i>I</i> > 2 $\sigma$ ( <i>I</i> )]    | 0.1053                                           |
| <i>R</i> (ref)                                    | 0.1946                                           |
| <i>wR</i> 2 [ <i>I</i> > 2 $\sigma$ ( <i>I</i> )] | 0.3087                                           |
| <i>wR</i> 2 (ref)                                 | 0.3512                                           |



(a)

| Retention Time | Height | Area%  | Resolution | Tailing Factor |
|----------------|--------|--------|------------|----------------|
| 8.338          | 313692 | 48.177 | 3.800      | 1.833          |
| 11.388         | 190932 | 48.383 | 2.613      | 1.766          |

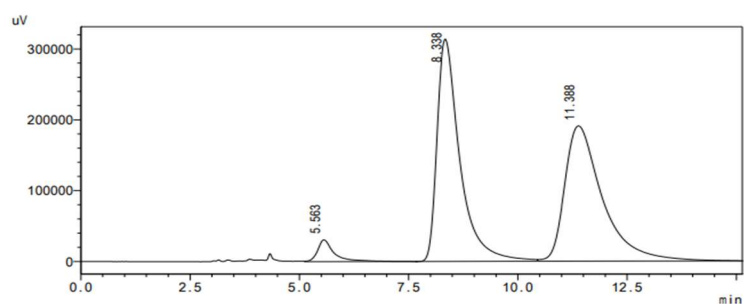

(b)

| Retention Time | Height | Area%  | Resolution | Tailing Factor |
|----------------|--------|--------|------------|----------------|
| 8.250          | 258934 | 99.844 | --         | 1.750          |
| 11.228         | 371    | 0.156  | 3.497      | 1.460          |

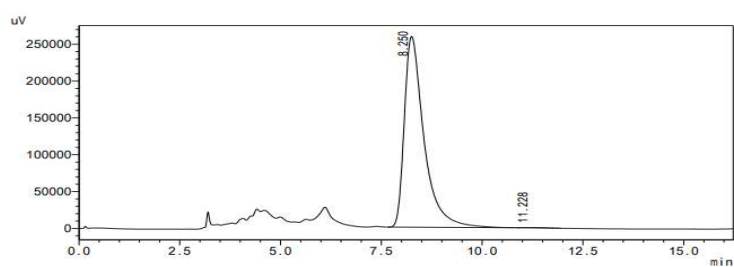

(c)

| Retention Time | Height | Area%  | Resolution | Tailing Factor |
|----------------|--------|--------|------------|----------------|
| 8.231          | 3063   | 0.438  | --         | 1.463          |
| 11.121         | 375295 | 99.562 | 2.584      | 1.798          |

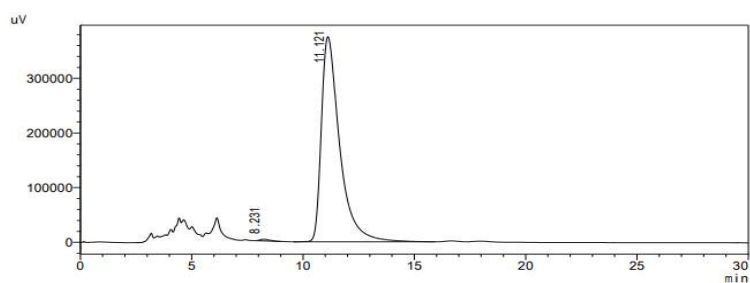

**Figure S2.** Racemic mixtures of **1** were separated by preparative chiral HPLC, condition: Unichiral CMD-5H column, 20mm I.D. × 250mm L, 30% n-Hexane/70% Ethanol/0.1%DEA(V/V/V), 25 mL/min, 254 nm. (a) Analytical HPLC trace of racemic sample; (b)

Analytical HPLC trace of enantiopure compound **1-R**,  $[\alpha]_D^{25} = -272.43$  ( $c = 1.0$  mg/mL) (c)  
 Chromatogram of enantiopure compound **1-S**,  $[\alpha]_D^{25} = 284.04$  ( $c = 1.0$  mg/mL).

(a)

### Thermal isomerization of **1-R**

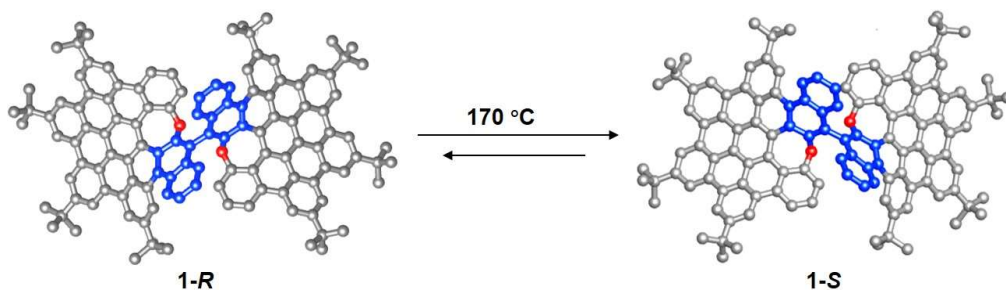

(b)

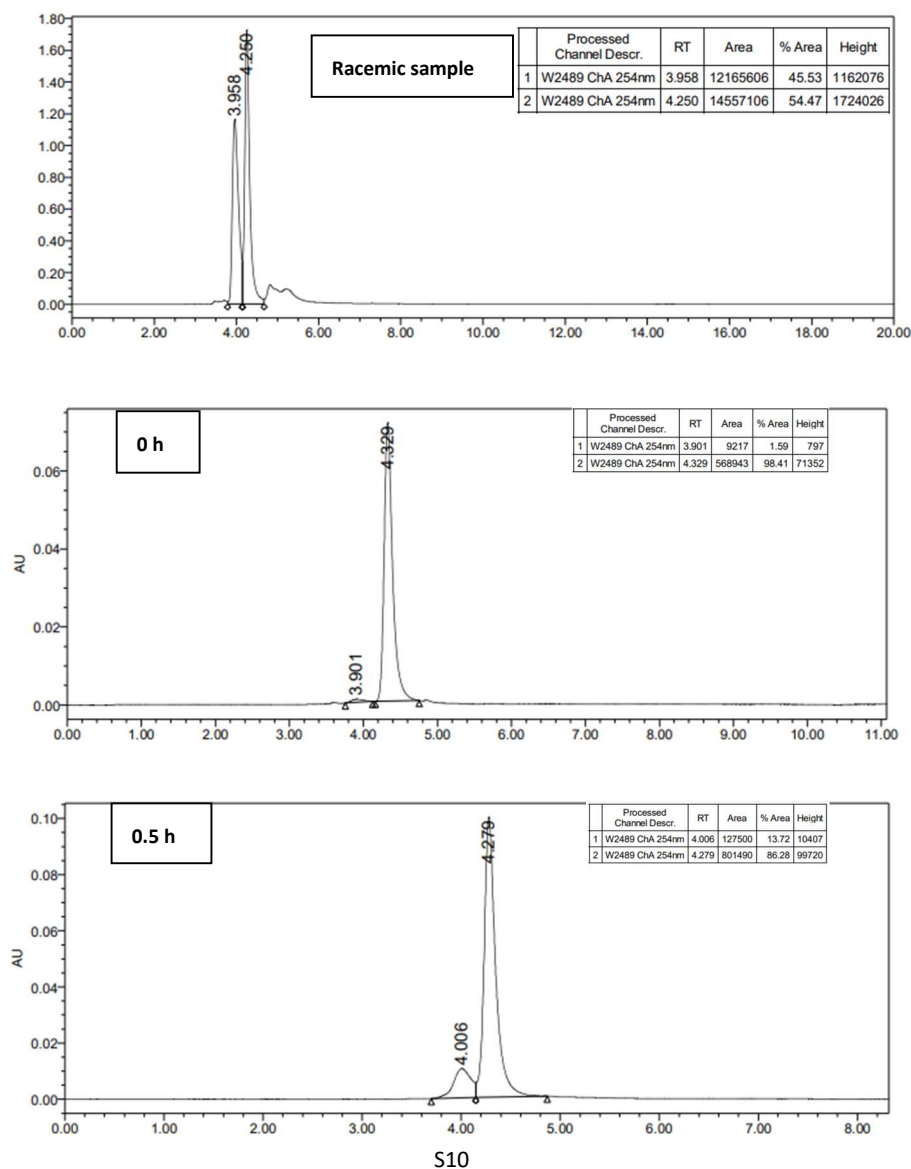

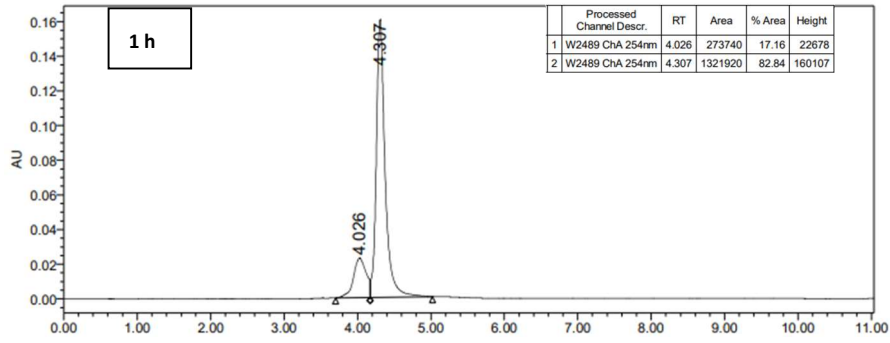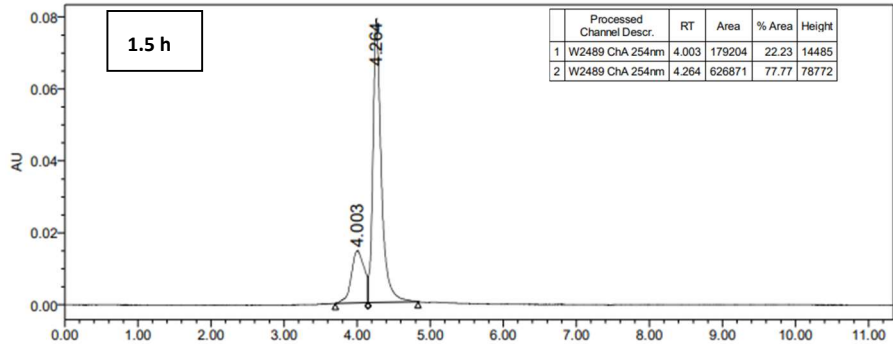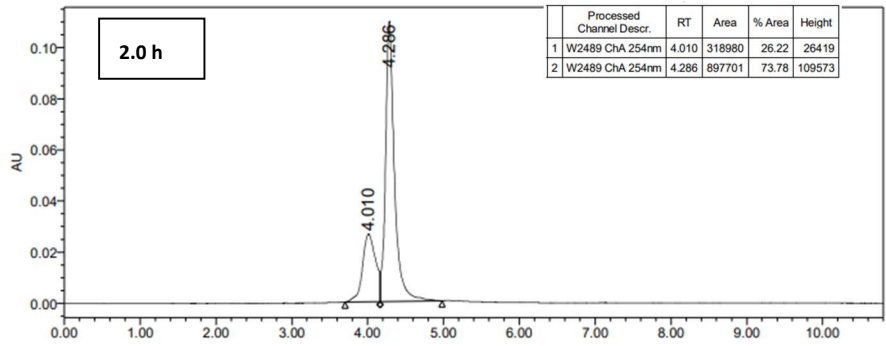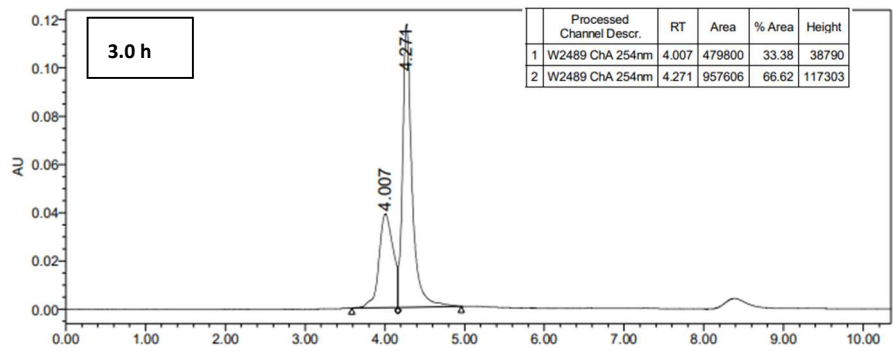

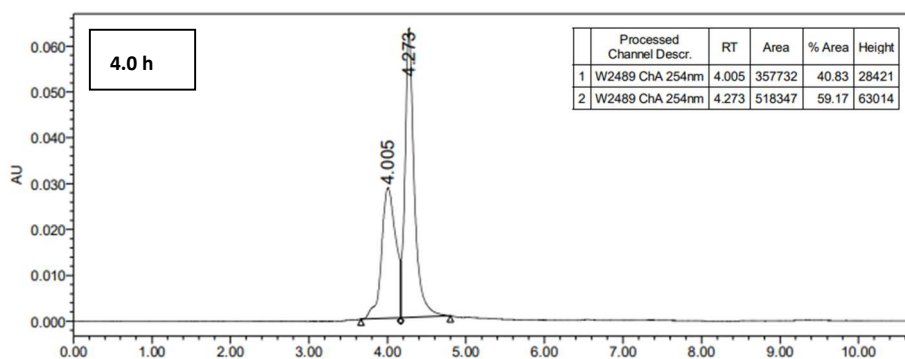

(c)

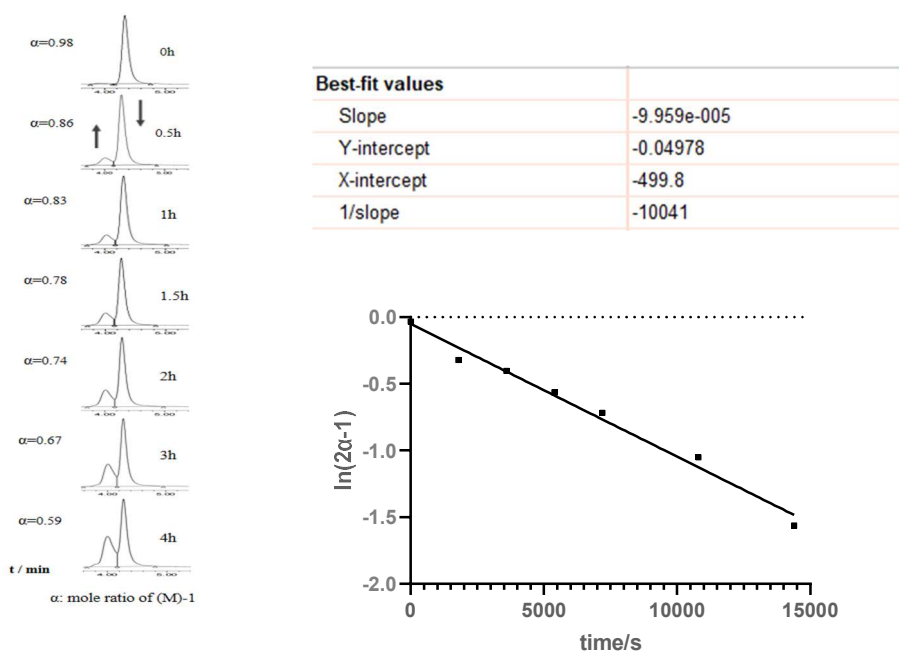

**Figure S3.** Thermal isomerization of **1-R** at 170 °C followed by chiral HPLC. (a) Scheme for thermal isomerization of **1-R**. (b) Chiral HPLC trace with analytic IA column after specific reaction time at 170 °C in 1,2-dichlorobenzene. Solvent was removed under reduced pressure before analyzing with eluent: hexane/isopropanol = 98:2, v/v; flow rate: 1.0 mL/min; detected by absorption at 254 nm. (c) Plot of HPLC-based conversion ratio of **1-R** ( $\alpha$ ) at time  $t$ . It switches between the (*R*)- and (*S*)-form isomers following a reversible first order reaction,<sup>[S3]</sup> with a rate constant ( $k$ ), which could be obtained by fitting the experimental data using the following equation:  $\ln(2\alpha - 1) = -2kt$  and  $k$  was determined as  $4.98 \cdot 10^{-5} \text{ s}^{-1}$ . Then the isomerization barrier ( $\Delta G^\ddagger$ ) was calculated from the Eyring equation:  $k = \kappa k_B T h K^\ddagger$  and  $\Delta G^\ddagger = -RT \ln K^\ddagger$ .  $K^\ddagger$  is the thermodynamic equilibrium constant. The Gibbs activation energy can be determined as  $\Delta G^\ddagger(T) = -RT \ln(kh/\kappa k_B T)$ .  $R$  is the gas constant ( $R = 8.314 \text{ J K}^{-1}$ );  $h$  is the Planck constant ( $h = 6.626 \times 10^{-34} \text{ J s}$ );  $k_B$  is the Boltzmann constant ( $k_B = 1.38 \times 10^{-23} \text{ J K}^{-1}$ );  $\kappa$  is the transmission coefficient ( $\kappa = 1$ ). As a result, the isomerization energy was determined as  $\Delta G^\ddagger = 146440.14 \text{ J/mol} = 34.98 \text{ kcal/mol}$ .  $t_{1/2} = \ln 2/k = 13918.6 \text{ s} = 232 \text{ min}$ .

(a)

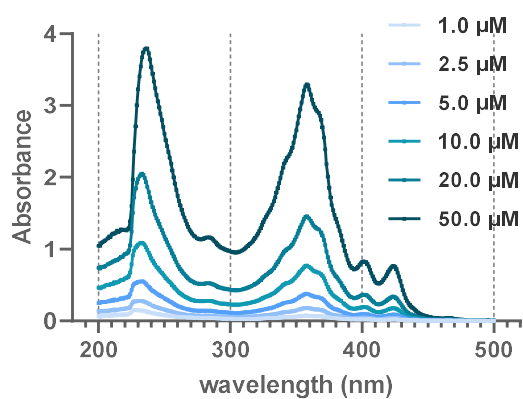

(b)

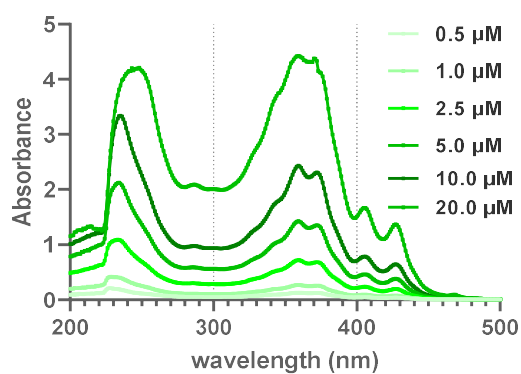

(c)

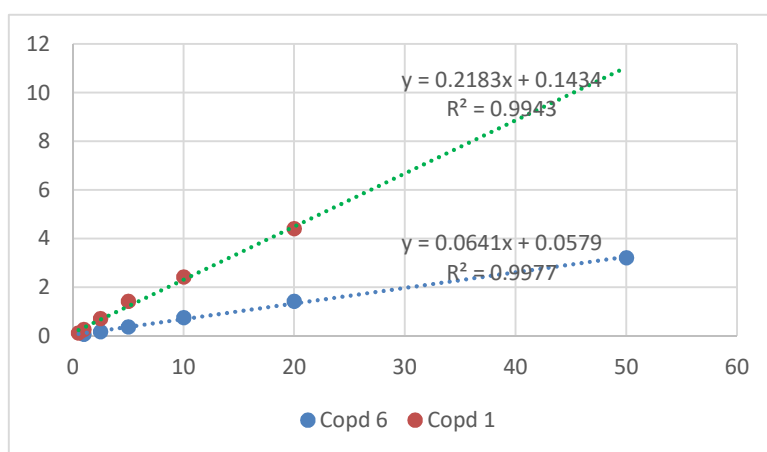

**Figure S4.** a) UV-vis spectra of compound **6** at different concentrations in DCM; b) UV-vis spectra of compound **1** at different concentrations in DCM; c) Absorbance vs concentration plots at the maximum wavelength at 360 nm.

(a)

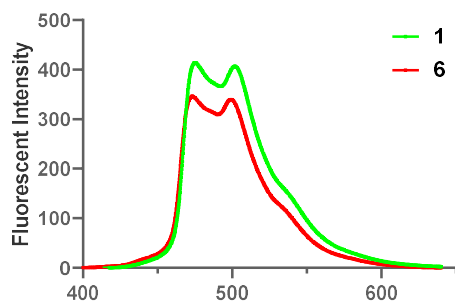

(b)

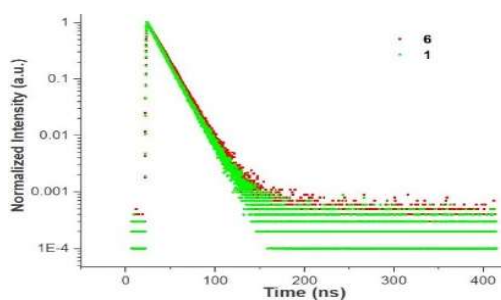

(c)

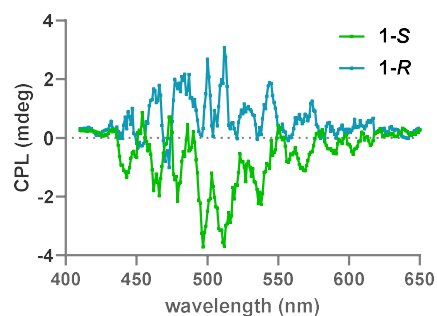

**Figure S5.** (a) Fluorescence spectra of monomer **6** and dimer **1**. (10  $\mu$ M in DCM); (b) Fluorescence decay of compounds monomer **1** and dimer **6** in DCM. (c) CPL spectra of **1-S** (green line) and **1-R** (cyan line).

**Table S2.** Summary of Photophysical Properties of Compounds **1** and **6**.

| Copd <sup>a</sup> | $\lambda_{\max}$ (nm) | $\epsilon_{\max}$ ( $M^{-1} \text{ cm}^{-1}$ ) | $\lambda_{\text{em}}$ (nm) | $\Phi_{\text{f}}^b$ | $\tau_{\text{f}}$ (ns) |
|-------------------|-----------------------|------------------------------------------------|----------------------------|---------------------|------------------------|
| <b>6</b>          | 358                   | $6.4 \times 10^4$                              | 474                        | 0.03                | 16.22                  |
| <b>1</b>          | 358                   | $2.2 \times 10^5$                              | 475                        | 0.02                | 15.04                  |

<sup>a</sup> Measured in DCM. <sup>b</sup> absolute fluorescent quantum yield.

## ROS Study by DCFH-DA.

2',7'-Dichlorodihydrofluorescein diacetate (DCFH-DA) was employed for in vitro ROS evaluation according to the reported method.<sup>[S4]</sup> The ROS generation produced by compound **1** and compound **6** could be evaluated by the fluorescence emission of DCFH that is converted from DCFH-DA. First, a NaOH (400  $\mu\text{L}$ , 0.01 M) solution was added to a DCFH-DA solution (10  $\mu\text{L}$ ,  $10 \times 10^{-3}$  M) to chemically hydrolyze DCFH-DA in the dark for 30 min followed by the addition of 4950  $\mu\text{L}$  of a PBS buffer solution to stop the reaction. Subsequently, the solution of DCFH (600  $\mu\text{L}$ ) was mixed with 2400  $\mu\text{L}$  of compound **1** or compound **6** in ACN to make the final concentration of 50  $\mu\text{M}$  for **1** and **6** as tested samples. As the control group, the solution of DCFH (600  $\mu\text{L}$ ) was mixed with 2400  $\mu\text{L}$  ACN. The fluorescence intensity of DCFH after incandescent light ( $1.5 \text{ W}\cdot\text{cm}^{-2}$ ) irradiation at different times (0s, 10s, 20s, 30s, 40s, 50s, 60s, 90s, 120s, 180s, 240s, 300s) was measured to estimate the ROS production ability of compound **1** and compound **6**.

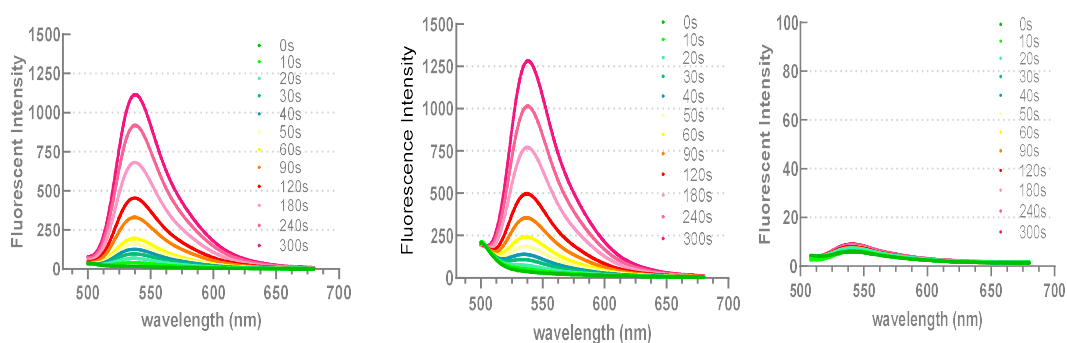

**Figure S6.** Fluorescence spectra of DCFH containing compounds **1** (left) or **6** (middle) as photosensitizer in PBS/ACN mixed solvents with white LED irradiation. The DCFH probe without any photosensitizer (right) was treated as control.

### Detection of Singlet Oxygen Release by DPBF.

1,3-diphenylisobenzofuran (DPBF) was used as the singlet oxygen probe for in vitro singlet oxygen release evaluation based on the reference with modifications.<sup>[S5]</sup> First to a solution of dichloromethane was added compound **1** and compound **6** to prepare stock solution 500  $\mu\text{M}$ . Then the DPBF was added into the sample solution to make the final concentration of photosensitizer at 25  $\mu\text{M}$  with the DPBF probe at 100  $\mu\text{M}$ . As the control group, the solution of DPBF was mixed with only dichloromethane (final concentration: 100  $\mu\text{M}$ ). The absorbance of DPBF after incandescent light ( $1.5 \text{ W}\cdot\text{cm}^{-2}$ ) irradiation at different times (0s, 10s, 20s, 30s, 40s, 50s, 60s, 90s, 120s) was measured to estimate the singlet oxygen releasing ability of compound **1** and compound **6**.

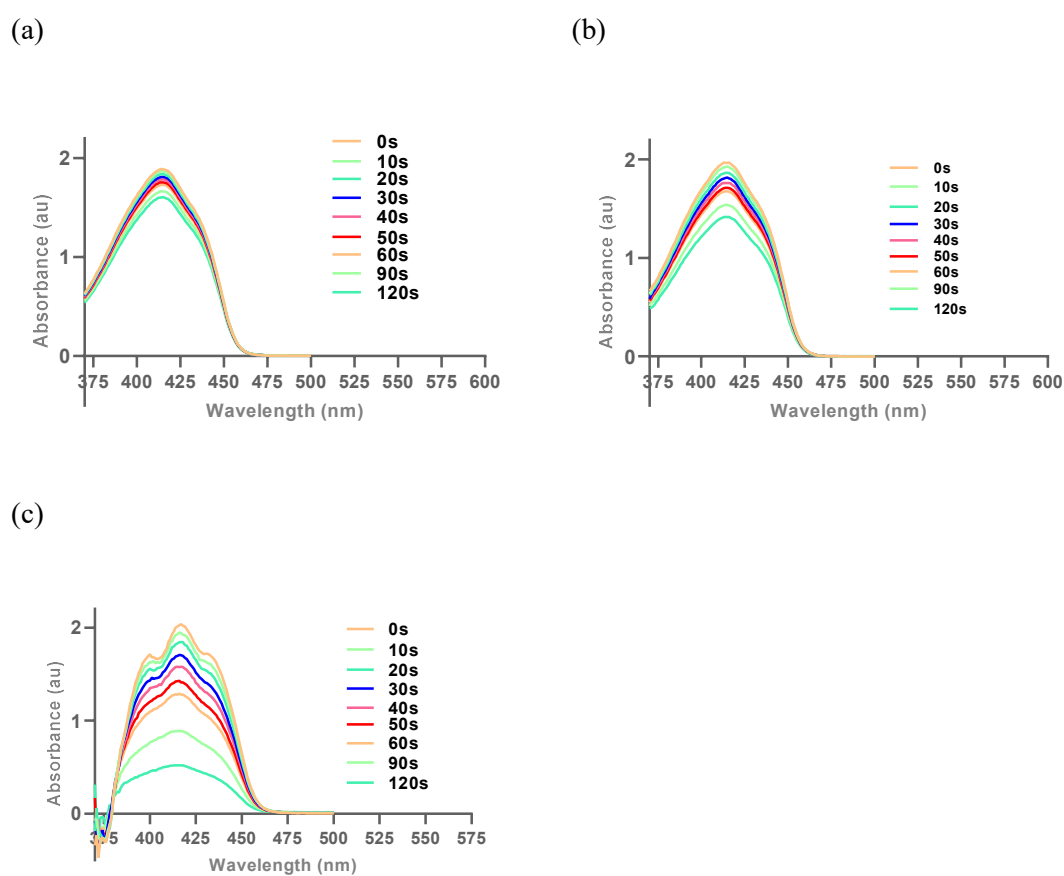

**Figure S7.** (a) Time-dependent absorption spectra of DPBF probe with white-light irradiation. (b) Time-dependent absorption spectra of DPBF probe in the presence of photosensitizer NG **6** with white-light irradiation. (c) Time-dependent absorption spectra of DPBF probe in the presence of photosensitizer NG **1** with white-light irradiation.



(a)

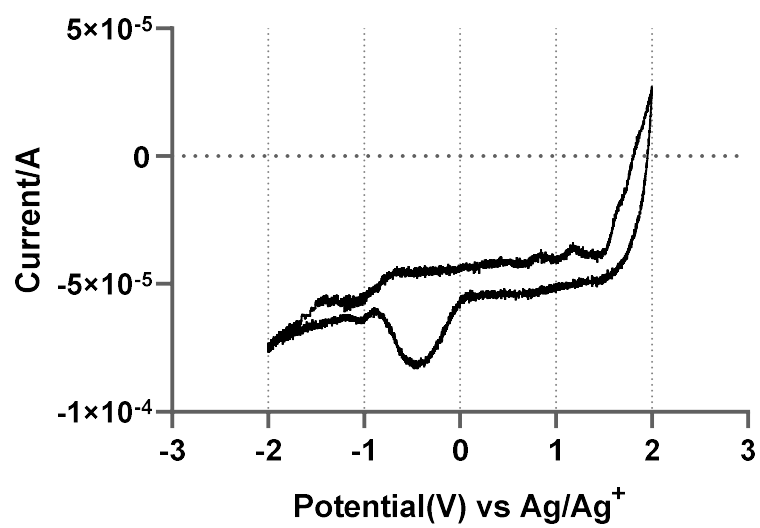

(b)

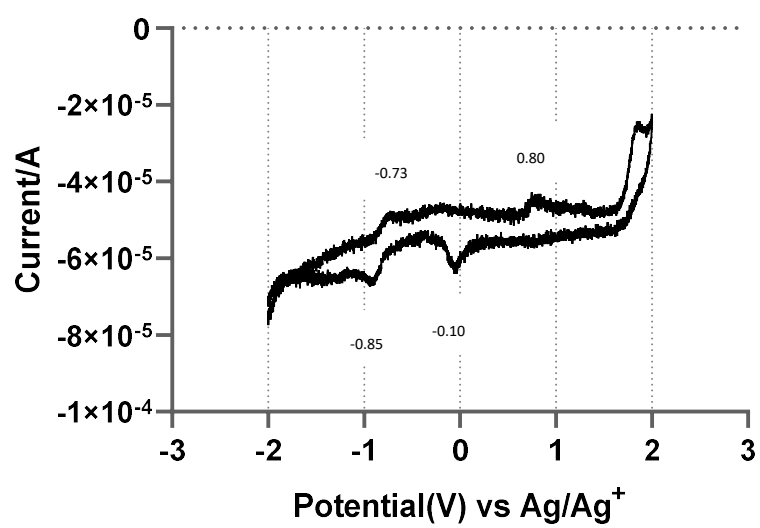

**Figure S8.** (a) Cyclic voltammograms of (a) monomer **6** and (b) oxa-NG **1** (supporting electrolyte: 0.1 M nBu<sub>4</sub>NPF<sub>6</sub> in CH<sub>2</sub>Cl<sub>2</sub>).

# Spectra

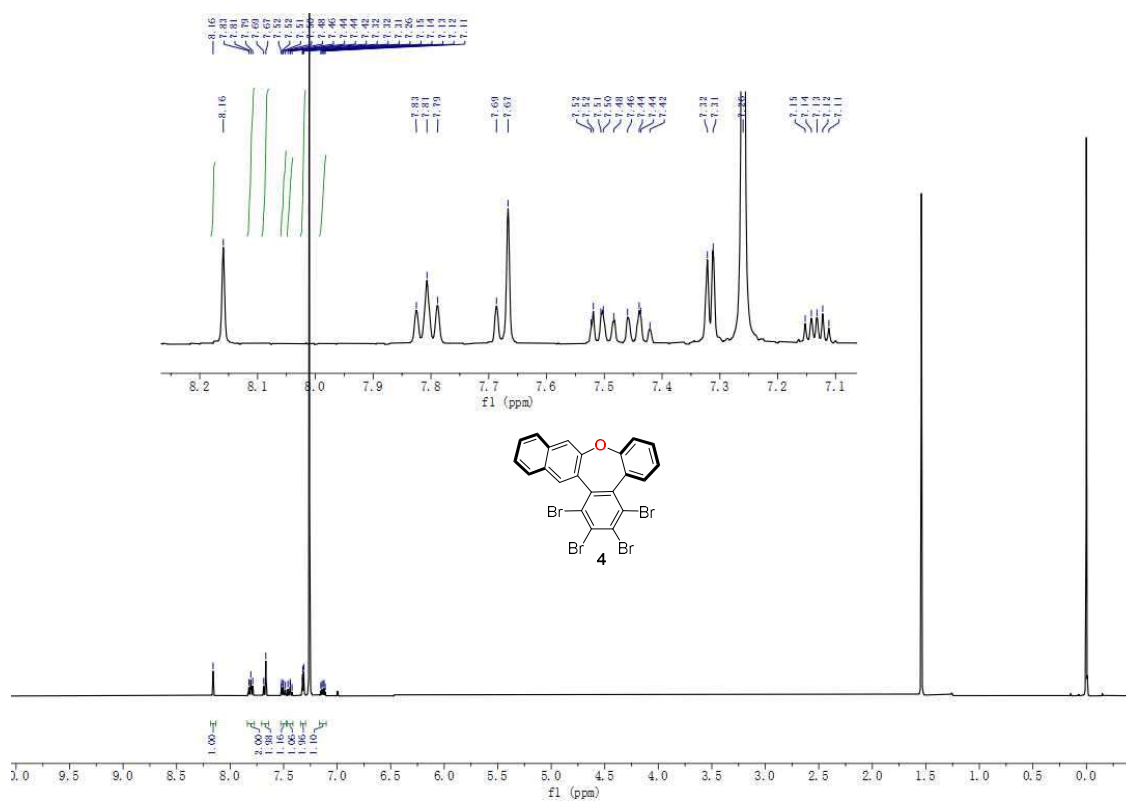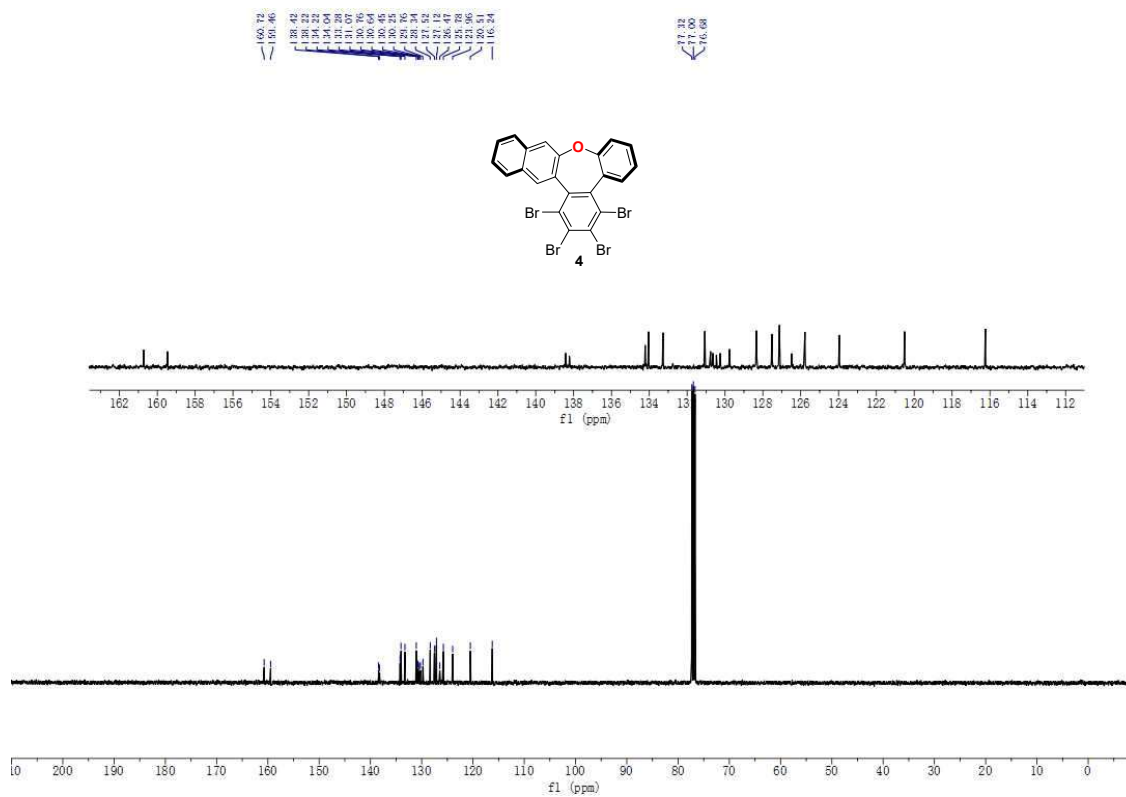

Figure S9. <sup>1</sup>H NMR (up) and <sup>13</sup>C NMR (down) of **4** in CDCl<sub>3</sub>.

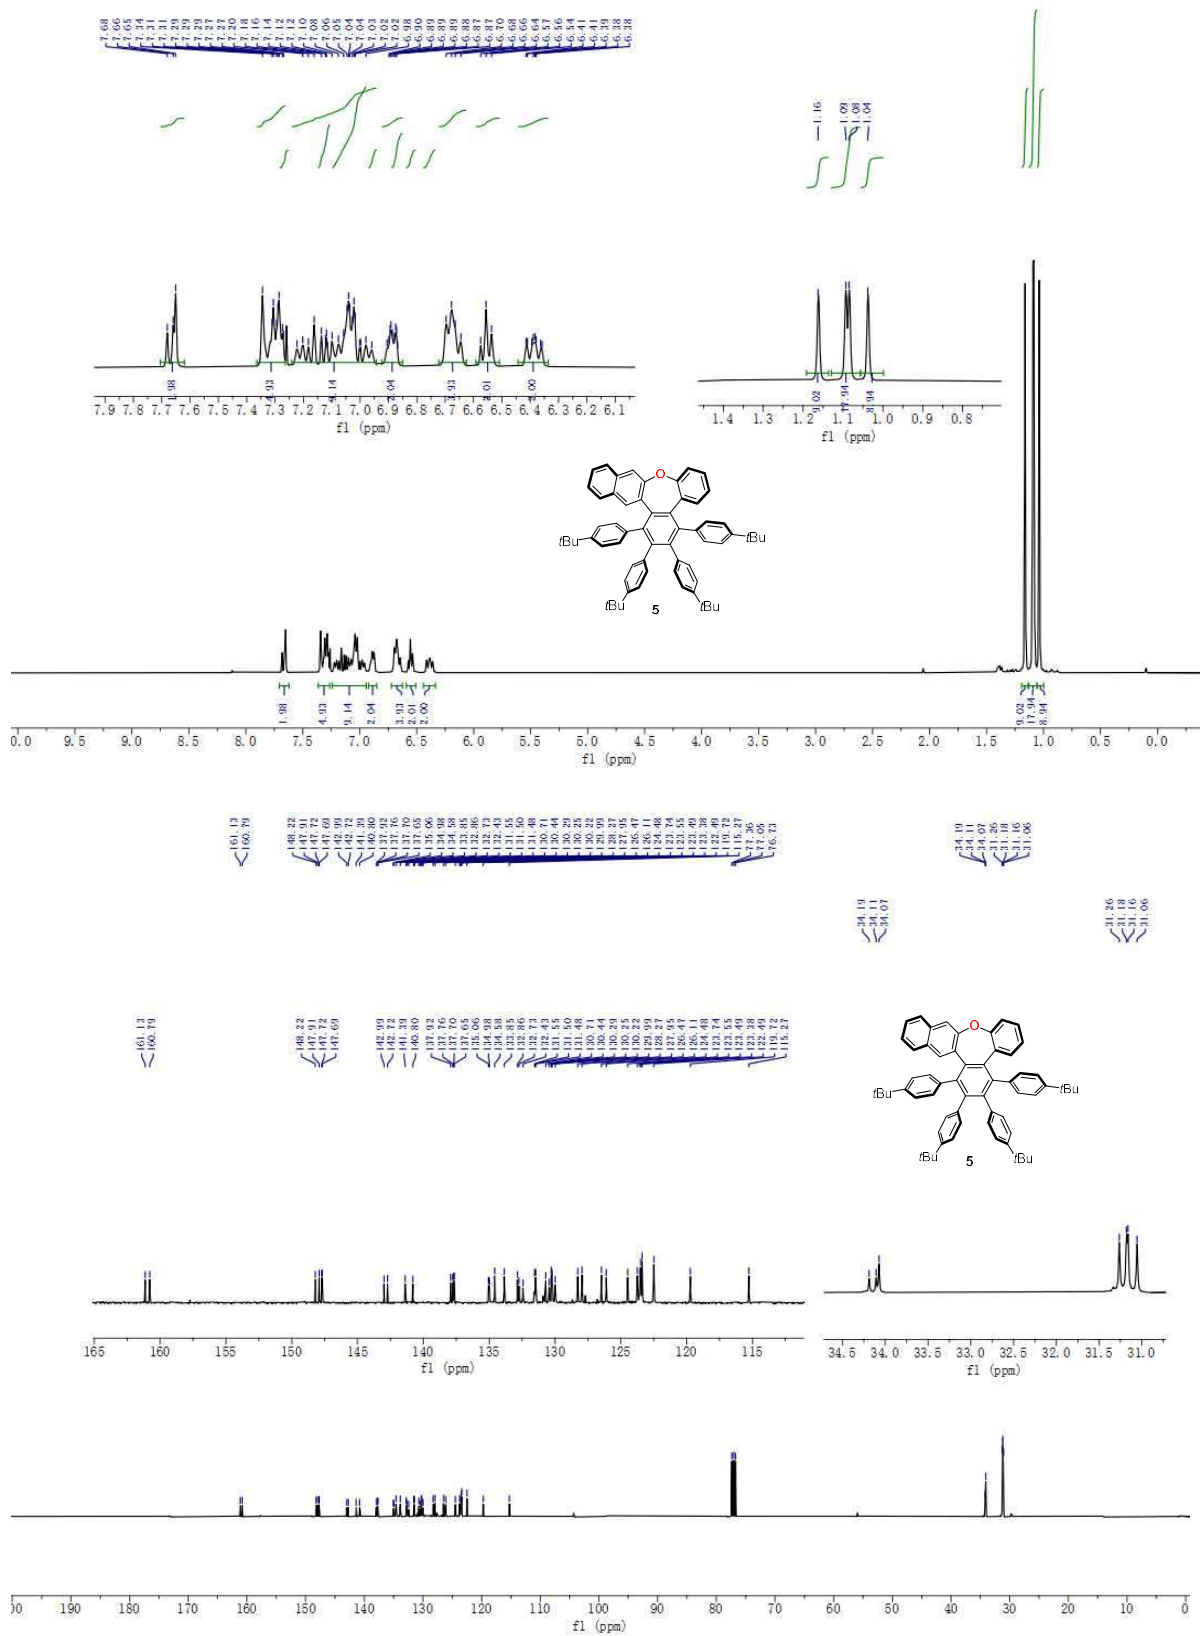

**Figure S10.** <sup>1</sup>H NMR (up) and <sup>13</sup>C NMR (down) of **5** in CDCl<sub>3</sub>.





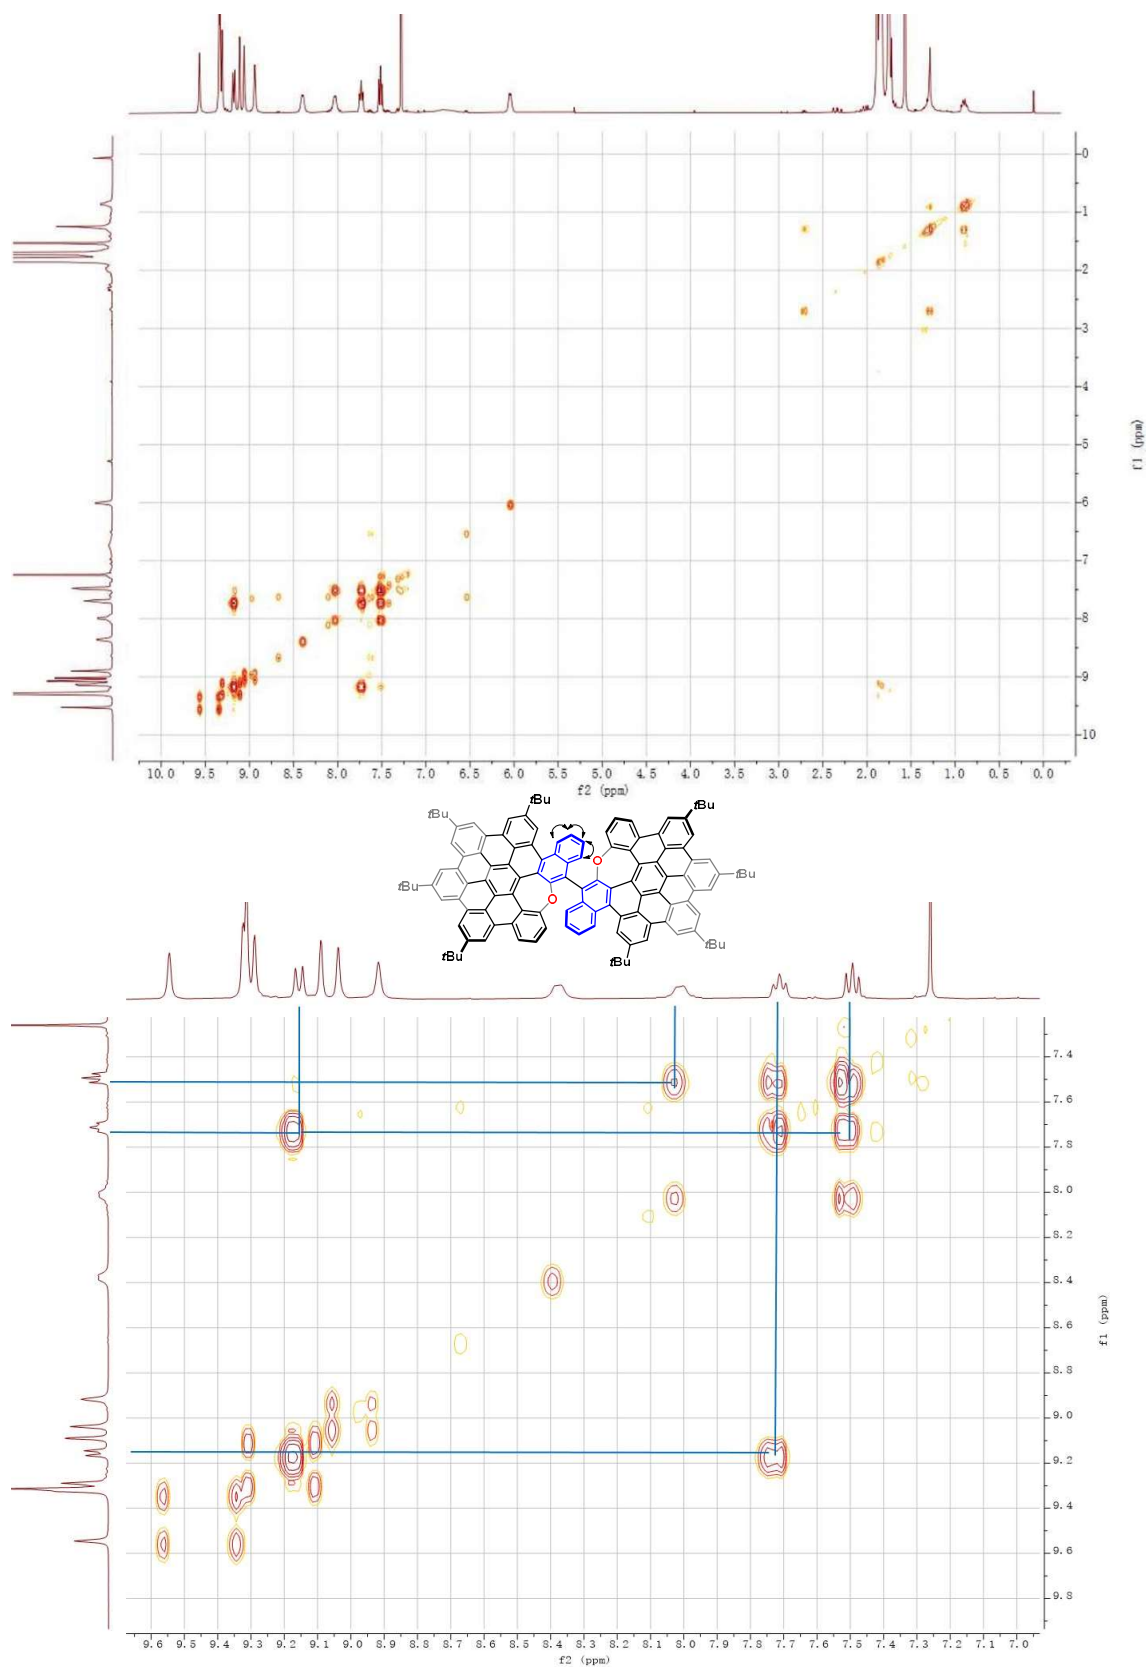

**Figure S13.** 2D H-H COSY spectrum (600 MHz,  $\text{CDCl}_3$ ) of NG 1 and the spin systems of protons in naphthalene ring marked in blue.

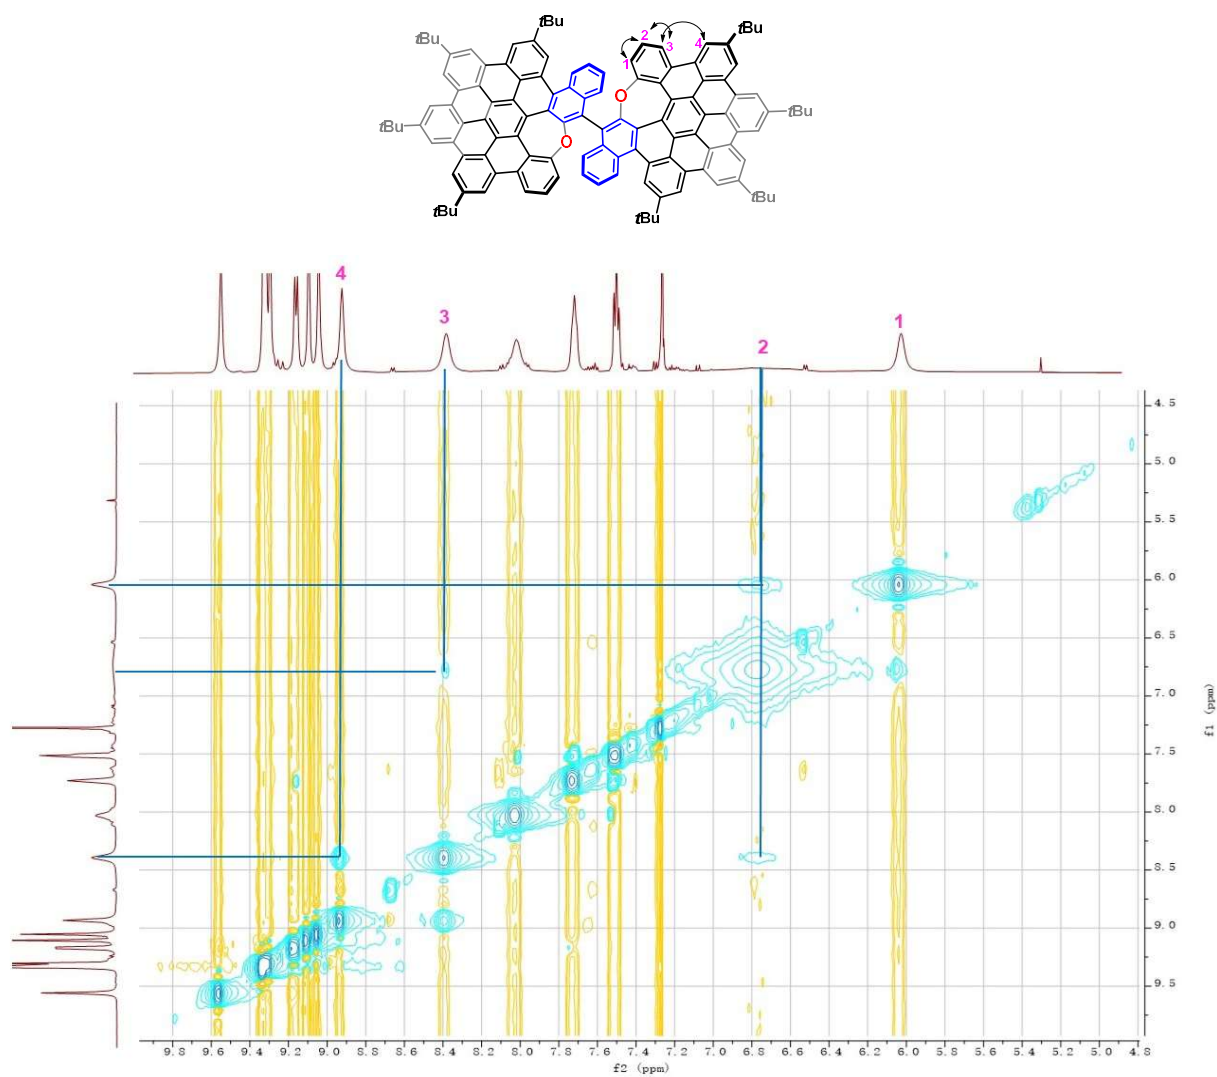

**Figure S14.** Partial 2D ROESY spectrum (600 MHz, CDCl<sub>3</sub>) of NG 1 and depiction of representative NOEs of proton 1–4. NOEs were highlighted in blue arrow.

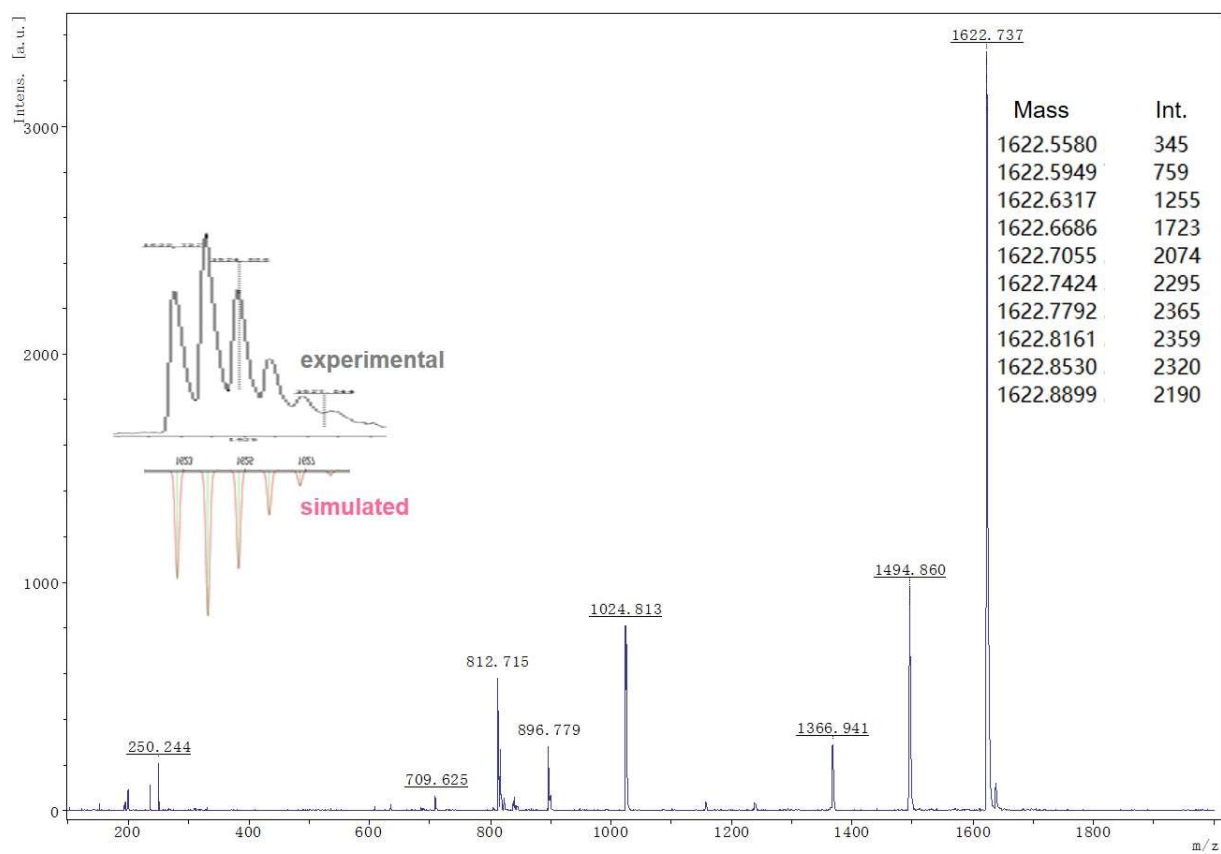

**Figure S15.** HR MALDI-TOF mass spectrum and isotopic distribution pattern of NG 1.



## Computational Details

Geometry calculations of the compounds **1** were carried out by DFT methods using the Gaussian 09 software.<sup>[S6]</sup> Ground state geometry were fully optimized by using density functional theory (DFT)<sup>[S7]</sup> and the M06-2X method with the 6-31G\*\* basis set for all atoms. Frequency calculations have been performed to verify the optimized structures as local minima or transition states and to obtain Gibbs free energy at 298 K. The atomic coordinates of the calculated structures are shown in Tables S3-S5. Colour coding: C, gray; H, white; N, blue. Electronic transitions of the M and P enantiomers of **1** were calculated by means of TD-DFT methods using the Gaussian 09 software, CAM-B3LYP/6-31G\*\* theory level was used and the first 100 excited states were considered in the gas phase.

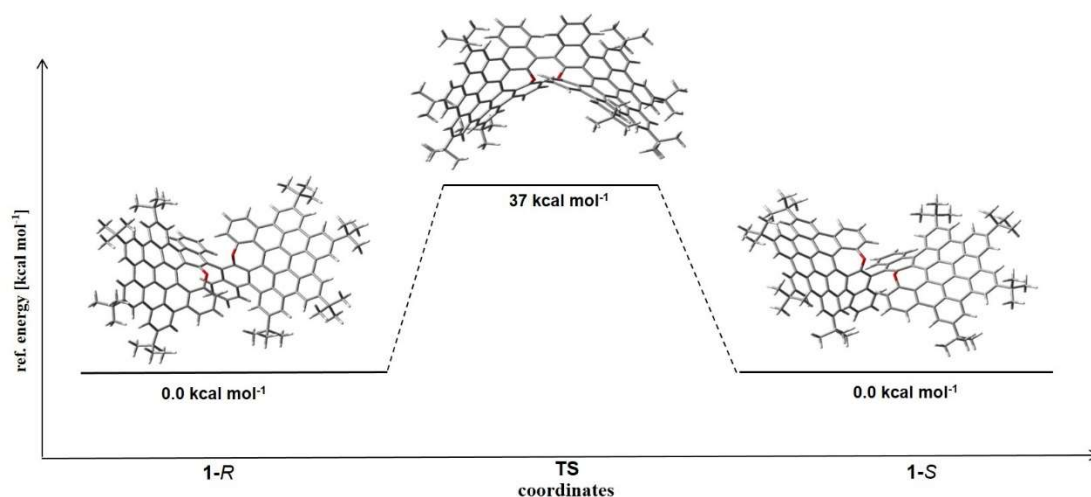

**Figure S16.** Computed racemization process of the NG-1 at the B3LYP/6-31G level.

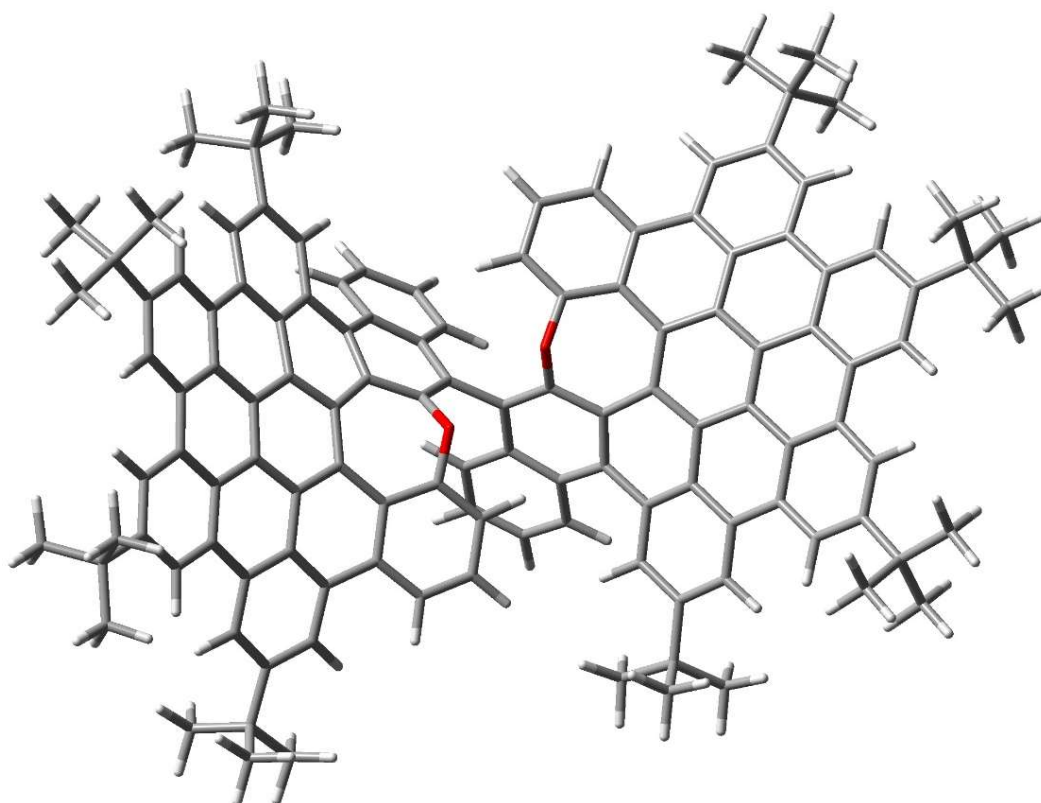

**Figure S17.** DFT optimized structure of **1-R**.

**Table S3.** Optimized energy and Atomic coordinates for the DFT calculated structure of **1-R**:

|                                              |                             |
|----------------------------------------------|-----------------------------|
| Zero-point correction=                       | 1.914276 (Hartree/Particle) |
| Thermal correction to Energy=                | 2.017186                    |
| Thermal correction to Enthalpy=              | 2.018131                    |
| Thermal correction to Gibbs Free Energy=     | 1.774463                    |
| Sum of electronic and zero-point Energies=   | -4933.697982                |
| Sum of electronic and thermal Energies=      | -4933.595071                |
| Sum of electronic and thermal Enthalpies=    | -4933.594127                |
| Sum of electronic and thermal Free Energies= | -4933.837795                |

| Center Number | Atomic Number | Atomic Type | Coordinates (Angstroms) |           |           |
|---------------|---------------|-------------|-------------------------|-----------|-----------|
|               |               |             | X                       | Y         | Z         |
| 1             | 8             | 0           | 1.185976                | -0.358222 | 0.498022  |
| 2             | 6             | 0           | 1.536507                | 0.562434  | 1.455249  |
| 3             | 6             | 0           | 2.134536                | 2.766047  | 3.028054  |
| 4             | 6             | 0           | 1.645154                | -1.619987 | 0.788107  |
| 5             | 6             | 0           | 6.045864                | 0.909282  | -0.605659 |
| 6             | 6             | 0           | 6.244500                | -0.476312 | -0.665748 |
| 7             | 6             | 0           | 4.924000                | 1.417194  | 0.093855  |
| 8             | 6             | 0           | 0.953557                | 2.014040  | 3.278295  |
| 9             | 6             | 0           | 8.046832                | 1.302349  | -2.018304 |
| 10            | 6             | 0           | 3.880085                | 0.558352  | 0.514629  |

|    |   |   |           |           |           |
|----|---|---|-----------|-----------|-----------|
| 11 | 6 | 0 | 5.274148  | -1.356010 | -0.112152 |
| 12 | 6 | 0 | 7.753659  | -2.367488 | -1.198752 |
| 13 | 6 | 0 | 3.930139  | 3.342654  | 1.300195  |
| 14 | 6 | 0 | 0.626201  | 0.925780  | 2.406960  |
| 15 | 6 | 0 | 2.806044  | 1.181149  | 1.291327  |
| 16 | 6 | 0 | 4.031961  | -0.864844 | 0.364890  |
| 17 | 6 | 0 | 0.685359  | -2.578389 | 1.051372  |
| 18 | 1 | 0 | -0.358512 | -2.281478 | 1.037300  |
| 19 | 6 | 0 | 7.441562  | -0.995784 | -1.289366 |
| 20 | 6 | 0 | 6.788303  | 3.208937  | -1.166221 |
| 21 | 6 | 0 | 8.840536  | 2.191511  | -2.754057 |
| 22 | 1 | 0 | 9.638530  | 1.799157  | -3.368423 |
| 23 | 6 | 0 | 4.868779  | 2.834905  | 0.373402  |
| 24 | 6 | 0 | 3.027785  | -1.882905 | 0.737975  |
| 25 | 6 | 0 | 6.978022  | 1.808972  | -1.247371 |
| 26 | 6 | 0 | 9.712181  | -2.051134 | -2.613426 |
| 27 | 6 | 0 | 2.976501  | 2.423333  | 1.902647  |
| 28 | 6 | 0 | 5.771153  | 3.733219  | -0.249034 |
| 29 | 6 | 0 | 3.826259  | 4.731343  | 1.481872  |
| 30 | 1 | 0 | 3.012333  | 5.112850  | 2.080184  |
| 31 | 6 | 0 | 8.315328  | -0.137479 | -2.001152 |
| 32 | 6 | 0 | 3.401457  | -3.234049 | 0.944619  |
| 33 | 6 | 0 | 4.787040  | -3.639053 | 0.732915  |
| 34 | 6 | 0 | 9.429136  | -0.686310 | -2.639244 |
| 35 | 1 | 0 | 10.108839 | -0.035189 | -3.175939 |
| 36 | 6 | 0 | 5.639600  | -2.751806 | 0.049680  |
| 37 | 6 | 0 | 6.904088  | -3.227981 | -0.375516 |
| 38 | 6 | 0 | 4.700867  | 5.620668  | 0.874883  |
| 39 | 6 | 0 | 7.325009  | -4.496960 | 0.016564  |
| 40 | 1 | 0 | 8.323685  | -4.823712 | -0.251350 |
| 41 | 6 | 0 | 8.861805  | -2.874367 | -1.881751 |
| 42 | 1 | 0 | 9.047607  | -3.939749 | -1.855563 |
| 43 | 6 | 0 | 8.620926  | 3.563170  | -2.741104 |
| 44 | 6 | 0 | 5.689573  | 5.092794  | 0.042044  |
| 45 | 1 | 0 | 6.412752  | 5.772628  | -0.393819 |
| 46 | 6 | 0 | 7.592430  | 4.049337  | -1.931340 |
| 47 | 1 | 0 | 7.406989  | 5.117237  | -1.918419 |
| 48 | 6 | 0 | 9.455076  | 4.545147  | -3.568419 |
| 49 | 6 | 0 | 5.255644  | -4.899441 | 1.122952  |
| 50 | 1 | 0 | 4.613318  | -5.531437 | 1.721223  |
| 51 | 6 | 0 | 4.623496  | 7.133115  | 1.096826  |
| 52 | 6 | 0 | 2.495514  | 3.759043  | 3.977295  |
| 53 | 1 | 0 | 3.457048  | 4.250148  | 3.887476  |
| 54 | 6 | 0 | 10.935241 | -2.581726 | -3.367072 |
| 55 | 6 | 0 | 2.426305  | -4.206249 | 1.229130  |
| 56 | 1 | 0 | 2.723096  | -5.241292 | 1.340106  |
| 57 | 6 | 0 | 0.110499  | 2.372679  | 4.359071  |
| 58 | 1 | 0 | -0.812424 | 1.819181  | 4.502974  |

|     |   |   |           |           |           |
|-----|---|---|-----------|-----------|-----------|
| 59  | 6 | 0 | 1.084007  | -3.890155 | 1.285338  |
| 60  | 1 | 0 | 0.342460  | -4.659680 | 1.474506  |
| 61  | 6 | 0 | 6.531584  | -5.340919 | 0.796342  |
| 62  | 6 | 0 | 1.684727  | 4.058228  | 5.046010  |
| 63  | 1 | 0 | 2.000069  | 4.805830  | 5.766705  |
| 64  | 6 | 0 | 7.088987  | -6.689881 | 1.256785  |
| 65  | 6 | 0 | 0.460034  | 3.384089  | 5.219845  |
| 66  | 1 | 0 | -0.189484 | 3.641503  | 6.050013  |
| 67  | 6 | 0 | 10.575362 | 3.844600  | -4.343544 |
| 68  | 1 | 0 | 10.178338 | 3.116542  | -5.057807 |
| 69  | 1 | 0 | 11.147526 | 4.586829  | -4.907868 |
| 70  | 1 | 0 | 11.268190 | 3.329462  | -3.670185 |
| 71  | 6 | 0 | 8.539218  | 5.258554  | -4.576950 |
| 72  | 1 | 0 | 7.730996  | 5.798322  | -4.075134 |
| 73  | 1 | 0 | 9.114914  | 5.981901  | -5.164302 |
| 74  | 1 | 0 | 8.086294  | 4.538160  | -5.264650 |
| 75  | 6 | 0 | 10.806485 | -2.231228 | -4.859006 |
| 76  | 1 | 0 | 10.746983 | -1.150485 | -5.015398 |
| 77  | 1 | 0 | 11.676553 | -2.603235 | -5.410326 |
| 78  | 1 | 0 | 9.906776  | -2.683176 | -5.286969 |
| 79  | 6 | 0 | 7.484190  | -7.528601 | 0.029864  |
| 80  | 1 | 0 | 8.247237  | -7.028048 | -0.572823 |
| 81  | 1 | 0 | 7.890167  | -8.494085 | 0.349773  |
| 82  | 1 | 0 | 6.615902  | -7.713842 | -0.609560 |
| 83  | 6 | 0 | 6.069414  | -7.486327 | 2.076665  |
| 84  | 1 | 0 | 5.169240  | -7.708112 | 1.494489  |
| 85  | 1 | 0 | 6.511779  | -8.438588 | 2.384027  |
| 86  | 1 | 0 | 5.773459  | -6.948162 | 2.982580  |
| 87  | 6 | 0 | 10.096026 | 5.585904  | -2.634533 |
| 88  | 1 | 0 | 10.740142 | 5.099848  | -1.895632 |
| 89  | 1 | 0 | 10.704411 | 6.287823  | -3.214423 |
| 90  | 1 | 0 | 9.341356  | 6.164973  | -2.095033 |
| 91  | 6 | 0 | 5.924874  | 7.606158  | 1.766416  |
| 92  | 1 | 0 | 6.799895  | 7.379342  | 1.150640  |
| 93  | 1 | 0 | 5.896028  | 8.689284  | 1.925837  |
| 94  | 1 | 0 | 6.060319  | 7.118296  | 2.736480  |
| 95  | 6 | 0 | 3.446780  | 7.524704  | 1.996870  |
| 96  | 1 | 0 | 3.525060  | 7.066368  | 2.988287  |
| 97  | 1 | 0 | 3.435655  | 8.610428  | 2.130941  |
| 98  | 1 | 0 | 2.488337  | 7.231726  | 1.556592  |
| 99  | 6 | 0 | 8.330920  | -6.447804 | 2.131411  |
| 100 | 1 | 0 | 8.075480  | -5.844368 | 3.007500  |
| 101 | 1 | 0 | 8.741341  | -7.402405 | 2.477467  |
| 102 | 1 | 0 | 9.116179  | -5.924146 | 1.578940  |
| 103 | 6 | 0 | 4.455313  | 7.845364  | -0.255342 |
| 104 | 1 | 0 | 3.537537  | 7.518895  | -0.753396 |
| 105 | 1 | 0 | 4.401517  | 8.928926  | -0.106605 |
| 106 | 1 | 0 | 5.294033  | 7.640122  | -0.926440 |

|     |   |   |           |           |           |
|-----|---|---|-----------|-----------|-----------|
| 107 | 6 | 0 | 11.077365 | -4.101702 | -3.240679 |
| 108 | 1 | 0 | 10.207707 | -4.622999 | -3.653221 |
| 109 | 1 | 0 | 11.960219 | -4.432564 | -3.795624 |
| 110 | 1 | 0 | 11.204050 | -4.408583 | -2.197533 |
| 111 | 6 | 0 | 12.205417 | -1.928652 | -2.796442 |
| 112 | 1 | 0 | 12.318061 | -2.163339 | -1.733731 |
| 113 | 1 | 0 | 13.089737 | -2.296860 | -3.327349 |
| 114 | 1 | 0 | 12.181052 | -0.840217 | -2.900114 |
| 115 | 8 | 0 | -1.477661 | 1.232353  | 0.601399  |
| 116 | 6 | 0 | -1.643444 | 0.326260  | 1.619711  |
| 117 | 6 | 0 | -1.882194 | -1.772098 | 3.421272  |
| 118 | 6 | 0 | -2.170306 | 2.396520  | 0.842183  |
| 119 | 6 | 0 | -5.951707 | -1.001978 | -0.451225 |
| 120 | 6 | 0 | -6.391683 | 0.310166  | -0.663917 |
| 121 | 6 | 0 | -4.799941 | -1.227132 | 0.343197  |
| 122 | 6 | 0 | -0.791780 | -0.867433 | 3.523767  |
| 123 | 6 | 0 | -7.742692 | -1.882133 | -1.920809 |
| 124 | 6 | 0 | -3.951607 | -0.155889 | 0.705954  |
| 125 | 6 | 0 | -5.632002 | 1.400951  | -0.161023 |
| 126 | 6 | 0 | -8.175804 | 1.837237  | -1.455074 |
| 127 | 6 | 0 | -3.545388 | -2.809714 | 1.780319  |
| 128 | 6 | 0 | -0.636362 | 0.149095  | 2.523507  |
| 129 | 6 | 0 | -2.807804 | -0.493283 | 1.555211  |
| 130 | 6 | 0 | -4.351400 | 1.191686  | 0.404654  |
| 131 | 6 | 0 | -1.420545 | 3.520162  | 1.129035  |
| 132 | 1 | 0 | -0.342432 | 3.418137  | 1.189374  |
| 133 | 6 | 0 | -7.618747 | 0.539512  | -1.391872 |
| 134 | 6 | 0 | -6.223766 | -3.438756 | -0.81405  |
| 135 | 6 | 0 | -8.294295 | -2.963531 | -2.620928 |
| 136 | 1 | 0 | -9.094221 | -2.780744 | -3.324568 |
| 137 | 6 | 0 | -4.508177 | -2.575656 | 0.771380  |
| 138 | 6 | 0 | -3.572901 | 2.400772  | 0.726750  |
| 139 | 6 | 0 | -6.659383 | -2.112012 | -1.044421 |
| 140 | 6 | 0 | -9.951335 | 1.026270  | -2.919640 |
| 141 | 6 | 0 | -2.777356 | -1.680920 | 2.288316  |
| 142 | 6 | 0 | -5.196012 | -3.678141 | 0.205408  |
| 143 | 6 | 0 | -3.221557 | -4.133841 | 2.123530  |
| 144 | 1 | 0 | -2.397944 | -4.306052 | 2.800126  |
| 145 | 6 | 0 | -8.271580 | -0.523782 | -2.054945 |
| 146 | 6 | 0 | -4.200977 | 3.666059  | 0.830337  |
| 147 | 6 | 0 | -5.617157 | 3.794873  | 0.497066  |
| 148 | 6 | 0 | -9.429265 | -0.255115 | -2.798576 |
| 149 | 1 | 0 | -9.939073 | -1.071783 | -3.290143 |
| 150 | 6 | 0 | -6.249686 | 2.714432  | -0.148178 |
| 151 | 6 | 0 | -7.547658 | 2.910486  | -0.680637 |
| 152 | 6 | 0 | -3.891120 | -5.220496 | 1.579520  |
| 153 | 6 | 0 | -8.212181 | 4.109853  | -0.437880 |
| 154 | 1 | 0 | -9.232676 | 4.223923  | -0.787015 |

|     |   |   |            |           |           |
|-----|---|---|------------|-----------|-----------|
| 155 | 6 | 0 | -9.306060  | 2.059588  | -2.235000 |
| 156 | 1 | 0 | -9.691208  | 3.068810  | -2.330718 |
| 157 | 6 | 0 | -7.824527  | -4.261338 | -2.465061 |
| 158 | 6 | 0 | -4.894016  | -4.965199 | 0.641479  |
| 159 | 1 | 0 | -5.449089  | -5.804109 | 0.237608  |
| 160 | 6 | 0 | -6.797317  | -4.476541 | -1.542527 |
| 161 | 1 | 0 | -6.421649  | -5.485431 | -1.415190 |
| 162 | 6 | 0 | -8.382661  | -5.446717 | -3.257207 |
| 163 | 6 | 0 | -6.327709  | 4.978811  | 0.731123  |
| 164 | 1 | 0 | -5.851756  | 5.771121  | 1.292360  |
| 165 | 6 | 0 | -3.560440  | -6.666728 | 1.957960  |
| 166 | 6 | 0 | -2.088223  | -2.686914 | 4.486113  |
| 167 | 1 | 0 | -2.986223  | -3.293847 | 4.493442  |
| 168 | 6 | 0 | -11.194063 | 1.340955  | -3.756617 |
| 169 | 6 | 0 | -3.437785  | 4.807795  | 1.132787  |
| 170 | 1 | 0 | -3.918997  | 5.775943  | 1.185055  |
| 171 | 6 | 0 | 0.131387   | -1.009085 | 4.587907  |
| 172 | 1 | 0 | 0.990270   | -0.347440 | 4.627934  |
| 173 | 6 | 0 | -2.068631  | 4.741136  | 1.294664  |
| 174 | 1 | 0 | -1.498434  | 5.637781  | 1.512955  |
| 175 | 6 | 0 | -7.634194  | 5.150720  | 0.292277  |
| 176 | 6 | 0 | -1.206796  | -2.770861 | 5.538148  |
| 177 | 1 | 0 | -1.401101  | -3.464138 | 6.350030  |
| 178 | 6 | 0 | -8.449017  | 6.414132  | 0.579129  |
| 179 | 6 | 0 | -0.064165  | -1.948802 | 5.570733  |
| 180 | 1 | 0 | 0.645706   | -2.036169 | 6.386658  |
| 181 | 6 | 0 | -9.513124  | -5.030530 | -4.203591 |
| 182 | 1 | 0 | -9.170238  | -4.300574 | -4.943611 |
| 183 | 1 | 0 | -9.877523  | -5.908292 | -4.745468 |
| 184 | 1 | 0 | -10.358650 | -4.600763 | -3.656867 |
| 185 | 6 | 0 | -7.253417  | -6.067320 | -4.097290 |
| 186 | 1 | 0 | -6.431351  | -6.422373 | -3.469228 |
| 187 | 1 | 0 | -7.633441  | -6.921153 | -4.668252 |
| 188 | 1 | 0 | -6.846736  | -5.334903 | -4.800906 |
| 189 | 6 | 0 | -11.784904 | 0.088947  | -4.412899 |
| 190 | 1 | 0 | -12.100055 | -0.647052 | -3.666240 |
| 191 | 1 | 0 | -12.665537 | 0.366122  | -4.999749 |
| 192 | 1 | 0 | -11.068990 | -0.386963 | -5.090534 |
| 193 | 6 | 0 | -8.893733  | 7.050929  | -0.747823 |
| 194 | 1 | 0 | -9.517322  | 6.370442  | -1.334525 |
| 195 | 1 | 0 | -9.478300  | 7.956191  | -0.552527 |
| 196 | 1 | 0 | -8.026918  | 7.324330  | -1.356758 |
| 197 | 6 | 0 | -7.644910  | 7.453906  | 1.365837  |
| 198 | 1 | 0 | -6.755905  | 7.775522  | 0.813903  |
| 199 | 1 | 0 | -8.265019  | 8.337401  | 1.544380  |
| 200 | 1 | 0 | -7.328542  | 7.066857  | 2.339513  |
| 201 | 6 | 0 | -8.933277  | -6.501074 | -2.282419 |
| 202 | 1 | 0 | -9.735859  | -6.080370 | -1.669274 |

|     |   |   |            |           |           |
|-----|---|---|------------|-----------|-----------|
| 203 | 1 | 0 | -9.334494  | -7.354243 | -2.839474 |
| 204 | 1 | 0 | -8.155992  | -6.875587 | -1.610269 |
| 205 | 6 | 0 | -4.823435  | -7.352728 | 2.505351  |
| 206 | 1 | 0 | -5.629553  | -7.371789 | 1.766741  |
| 207 | 1 | 0 | -4.597806  | -8.388379 | 2.780139  |
| 208 | 1 | 0 | -5.192551  | -6.832371 | 3.394184  |
| 209 | 6 | 0 | -2.470380  | -6.748887 | 3.031632  |
| 210 | 1 | 0 | -2.766068  | -6.226108 | 3.947296  |
| 211 | 1 | 0 | -2.287431  | -7.797063 | 3.286396  |
| 212 | 1 | 0 | -1.524183  | -6.322528 | 2.683977  |
| 213 | 6 | 0 | -9.690089  | 6.034714  | 1.405224  |
| 214 | 1 | 0 | -9.397083  | 5.571004  | 2.351924  |
| 215 | 1 | 0 | -10.283477 | 6.927953  | 1.627185  |
| 216 | 1 | 0 | -10.330404 | 5.329170  | 0.868142  |
| 217 | 6 | 0 | -3.071391  | -7.416624 | 0.707606  |
| 218 | 1 | 0 | -2.172176  | -6.944599 | 0.299859  |
| 219 | 1 | 0 | -2.833457  | -8.456138 | 0.957036  |
| 220 | 1 | 0 | -3.832465  | -7.423497 | -0.078204 |
| 221 | 6 | 0 | -10.816088 | 2.335836  | -4.866853 |
| 222 | 1 | 0 | -10.052774 | 1.910106  | -5.524974 |
| 223 | 1 | 0 | -11.696505 | 2.578839  | -5.471172 |
| 224 | 1 | 0 | -10.423034 | 3.269749  | -4.455509 |
| 225 | 6 | 0 | -12.271602 | 1.966353  | -2.854796 |
| 226 | 1 | 0 | -11.923730 | 2.896902  | -2.397376 |
| 227 | 1 | 0 | -13.167824 | 2.195480  | -3.440798 |
| 228 | 1 | 0 | -12.551005 | 1.279117  | -2.050565 |

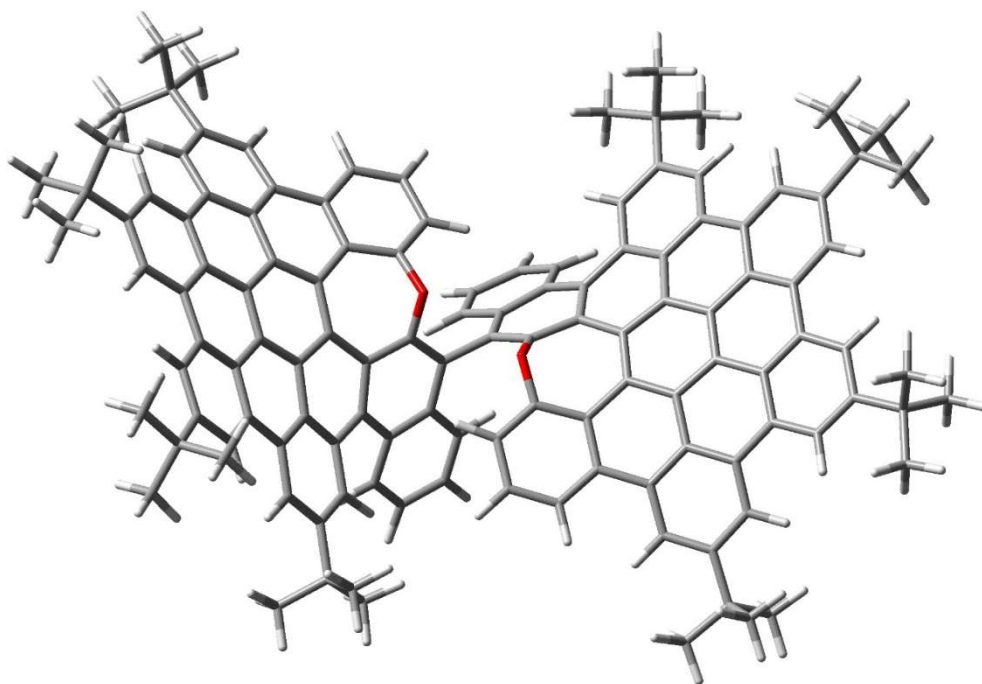

**Figure S18.** DFT optimized structure of 1-S.

**Table S4.** Optimized energy and Atomic coordinates for the DFT calculated structure of 1-S:

|                                              |                             |
|----------------------------------------------|-----------------------------|
| Zero-point correction=                       | 1.914276 (Hartree/Particle) |
| Thermal correction to Energy=                | 2.017187                    |
| Thermal correction to Enthalpy=              | 2.018131                    |
| Thermal correction to Gibbs Free Energy=     | 1.774457                    |
| Sum of electronic and zero-point Energies=   | -4933.697982                |
| Sum of electronic and thermal Energies=      | -4933.595071                |
| Sum of electronic and thermal Enthalpies=    | -4933.594126                |
| Sum of electronic and thermal Free Energies= | -4933.837800                |

| Center<br>Number | Atomic<br>Number | Atomic<br>Type | Coordinates (Angstroms) |           |           |
|------------------|------------------|----------------|-------------------------|-----------|-----------|
|                  |                  |                | X                       | Y         | Z         |
| 1                | 8                | 0              | 1.185589                | 0.358216  | 0.498291  |
| 2                | 6                | 0              | 1.536379                | -0.562230 | 1.455621  |
| 3                | 6                | 0              | 2.134781                | -2.765642 | 3.028597  |
| 4                | 6                | 0              | 1.644753                | 1.620058  | 0.788064  |
| 5                | 6                | 0              | 6.045437                | -0.909185 | -0.605932 |
| 6                | 6                | 0              | 6.244038                | 0.476411  | -0.666124 |
| 7                | 6                | 0              | 4.923652                | -1.417070 | 0.093731  |
| 8                | 6                | 0              | 0.953870                | -2.013591 | 3.279024  |
| 9                | 6                | 0              | 8.046421                | -1.302322 | -2.018530 |
| 10               | 6                | 0              | 3.879769                | -0.558217 | 0.514549  |
| 11               | 6                | 0              | 5.273693                | 1.356134  | -0.112552 |
| 12               | 6                | 0              | 7.753153                | 2.367580  | -1.199275 |
| 13               | 6                | 0              | 3.929987                | -3.342423 | 1.300375  |
| 14               | 6                | 0              | 0.626292                | -0.925479 | 2.407577  |
| 15               | 6                | 0              | 2.805890                | -1.180937 | 1.291520  |
| 16               | 6                | 0              | 4.031559                | 0.864970  | 0.364636  |
| 17               | 6                | 0              | 0.684933                | 2.578441  | 1.051316  |
| 18               | 1                | 0              | -0.358934               | 2.281416  | 1.037433  |
| 19               | 6                | 0              | 7.441077                | 0.995864  | -1.289802 |
| 20               | 6                | 0              | 6.787920                | -3.208879 | -1.166308 |
| 21               | 6                | 0              | 8.840254                | -2.191531 | -2.754082 |
| 22               | 1                | 0              | 9.638311                | -1.799227 | -3.368399 |
| 23               | 6                | 0              | 4.868492                | -2.834759 | 0.373397  |
| 24               | 6                | 0              | 3.027367                | 1.883026  | 0.737710  |
| 25               | 6                | 0              | 6.977599                | -1.808913 | -1.247585 |
| 26               | 6                | 0              | 9.711709                | 2.051157  | -2.613884 |
| 27               | 6                | 0              | 2.976480                | -2.423046 | 1.902950  |
| 28               | 6                | 0              | 5.770795                | -3.733119 | -0.249070 |
| 29               | 6                | 0              | 3.826091                | -4.731094 | 1.482170  |
| 30               | 1                | 0              | 3.012270                | -5.112532 | 2.080667  |
| 31               | 6                | 0              | 8.314855                | 0.137525  | -2.001533 |
| 32               | 6                | 0              | 3.400996                | 3.234212  | 0.944165  |
| 33               | 6                | 0              | 4.786557                | 3.639240  | 0.732353  |
| 34               | 6                | 0              | 9.428654                | 0.686338  | -2.639664 |
| 35               | 1                | 0              | 10.108341               | 0.035227  | -3.176376 |
| 36               | 6                | 0              | 5.639116                | 2.751950  | 0.049167  |



|    |   |   |           |           |           |
|----|---|---|-----------|-----------|-----------|
| 37 | 6 | 0 | 6.903600  | 3.228109  | -0.376060 |
| 38 | 6 | 0 | 4.700576  | -5.620477 | 0.875079  |
| 39 | 6 | 0 | 7.324549  | 4.497087  | 0.015989  |
| 40 | 1 | 0 | 8.323267  | 4.823767  | -0.251860 |
| 41 | 6 | 0 | 8.861283  | 2.874436  | -1.882307 |
| 42 | 1 | 0 | 9.047042  | 3.939826  | -1.856219 |
| 43 | 6 | 0 | 8.620716  | -3.563200 | -2.740977 |
| 44 | 6 | 0 | 5.689196  | -5.092671 | 0.042089  |
| 45 | 1 | 0 | 6.412272  | -5.772588 | -0.393775 |
| 46 | 6 | 0 | 7.592131  | -4.049311 | -1.931285 |
| 47 | 1 | 0 | 7.406759  | -5.117205 | -1.918322 |
| 48 | 6 | 0 | 9.455107  | -4.545278 | -3.567922 |
| 49 | 6 | 0 | 5.255162  | 4.899658  | 1.122299  |
| 50 | 1 | 0 | 4.612867  | 5.531699  | 1.720553  |
| 51 | 6 | 0 | 4.623200  | -7.132911 | 1.097119  |
| 52 | 6 | 0 | 2.496017  | -3.758523 | 3.977868  |
| 53 | 1 | 0 | 3.457499  | -4.249679 | 3.887799  |
| 54 | 6 | 0 | 10.934802 | 2.581750  | -3.367465 |
| 55 | 6 | 0 | 2.425824  | 4.206401  | 1.228657  |
| 56 | 1 | 0 | 2.722569  | 5.241474  | 1.339484  |
| 57 | 6 | 0 | 0.111108  | -2.372087 | 4.360081  |
| 58 | 1 | 0 | -0.811789 | -1.818593 | 4.504197  |
| 59 | 6 | 0 | 1.083538  | 3.890265  | 1.285055  |
| 60 | 1 | 0 | 0.342019  | 4.659803  | 1.474209  |
| 61 | 6 | 0 | 6.531117  | 5.341101  | 0.795698  |
| 62 | 6 | 0 | 1.685529  | -4.057542 | 5.046852  |
| 63 | 1 | 0 | 2.001045  | -4.805052 | 5.767565  |
| 64 | 6 | 0 | 7.088564  | 6.690006  | 1.256240  |
| 65 | 6 | 0 | 0.460888  | -3.383363 | 5.220912  |
| 66 | 1 | 0 | -0.188402 | -3.640646 | 6.051297  |
| 67 | 6 | 0 | 10.575193 | -3.844750 | -4.343338 |
| 68 | 1 | 0 | 10.177962 | -3.116855 | -5.057666 |
| 69 | 1 | 0 | 11.147337 | -4.587029 | -4.907623 |
| 70 | 1 | 0 | 11.268077 | -3.329414 | -3.670186 |
| 71 | 6 | 0 | 8.539429  | -5.259333 | -4.576150 |
| 72 | 1 | 0 | 7.731275  | -5.799009 | -4.074122 |
| 73 | 1 | 0 | 9.115276  | -5.982857 | -5.163135 |
| 74 | 1 | 0 | 8.086420  | -4.539334 | -5.264209 |
| 75 | 6 | 0 | 10.806034 | 2.231497  | -4.859459 |
| 76 | 1 | 0 | 10.746465 | 1.150770  | -5.015998 |
| 77 | 1 | 0 | 11.676131 | 2.603533  | -5.410706 |
| 78 | 1 | 0 | 9.906349  | 2.683569  | -5.287380 |
| 79 | 6 | 0 | 7.484352  | 7.528607  | 0.029444  |
| 80 | 1 | 0 | 8.247586  | 7.027950  | -0.572918 |
| 81 | 1 | 0 | 7.890322  | 8.494053  | 0.349468  |
| 82 | 1 | 0 | 6.616340  | 7.713923  | -0.610324 |
| 83 | 6 | 0 | 6.068810  | 7.486679  | 2.075683  |
| 84 | 1 | 0 | 5.168854  | 7.708490  | 1.493182  |

|     |   |   |           |           |           |
|-----|---|---|-----------|-----------|-----------|
| 85  | 1 | 0 | 6.511210  | 8.438914  | 2.383067  |
| 86  | 1 | 0 | 5.772506  | 6.948660  | 2.981571  |
| 87  | 6 | 0 | 10.096307 | -5.585477 | -2.633590 |
| 88  | 1 | 0 | 10.740229 | -5.098922 | -1.894848 |
| 89  | 1 | 0 | 10.704939 | -6.287452 | -3.213167 |
| 90  | 1 | 0 | 9.341763  | -6.164553 | -2.093908 |
| 91  | 6 | 0 | 5.924650  | -7.605938 | 1.766594  |
| 92  | 1 | 0 | 6.799615  | -7.379114 | 1.150742  |
| 93  | 1 | 0 | 5.895822  | -8.689058 | 1.926035  |
| 94  | 1 | 0 | 6.060174  | -7.118064 | 2.736642  |
| 95  | 6 | 0 | 3.446594  | -7.524421 | 1.997340  |
| 96  | 1 | 0 | 3.525082  | -7.066074 | 2.988734  |
| 97  | 1 | 0 | 3.435417  | -8.610142 | 2.131408  |
| 98  | 1 | 0 | 2.488104  | -7.231363 | 1.557224  |
| 99  | 6 | 0 | 8.330110  | 6.447770  | 2.131369  |
| 100 | 1 | 0 | 8.074233  | 5.844401  | 3.007373  |
| 101 | 1 | 0 | 8.740549  | 7.402318  | 2.477554  |
| 102 | 1 | 0 | 9.115483  | 5.923962  | 1.579207  |
| 103 | 6 | 0 | 4.454887  | -7.845235 | -0.254998 |
| 104 | 1 | 0 | 3.537088  | -7.518753 | -0.752993 |
| 105 | 1 | 0 | 4.401065  | -8.928785 | -0.106203 |
| 106 | 1 | 0 | 5.293569  | -7.640028 | -0.926149 |
| 107 | 6 | 0 | 11.077127 | 4.101694  | -3.240743 |
| 108 | 1 | 0 | 10.207546 | 4.623170  | -3.653213 |
| 109 | 1 | 0 | 11.960024 | 4.432574  | -3.795580 |
| 110 | 1 | 0 | 11.203778 | 4.408301  | -2.197516 |
| 111 | 6 | 0 | 12.204936 | 1.928441  | -2.797011 |
| 112 | 1 | 0 | 12.317824 | 2.163191  | -1.734335 |
| 113 | 1 | 0 | 13.089241 | 2.296433  | -3.328101 |
| 114 | 1 | 0 | 12.180339 | 0.840009  | -2.900600 |
| 115 | 8 | 0 | -1.477331 | -1.232200 | 0.601925  |
| 116 | 6 | 0 | -1.643297 | -0.326139 | 1.620232  |
| 117 | 6 | 0 | -1.882392 | 1.772184  | 3.421734  |
| 118 | 6 | 0 | -2.169901 | -2.396431 | 0.842591  |
| 119 | 6 | 0 | -5.951427 | 1.001800  | -0.451236 |
| 120 | 6 | 0 | -6.391234 | -0.310377 | -0.664087 |
| 121 | 6 | 0 | -4.799783 | 1.227024  | 0.343350  |
| 122 | 6 | 0 | -0.791930 | 0.867601  | 3.524376  |
| 123 | 6 | 0 | -7.742317 | 1.881863  | -1.921012 |
| 124 | 6 | 0 | -3.951392 | 0.155833  | 0.706168  |
| 125 | 6 | 0 | -5.631511 | -1.401119 | -0.161165 |
| 126 | 6 | 0 | -8.175104 | -1.837586 | -1.455587 |
| 127 | 6 | 0 | -3.545468 | 2.809690  | 1.780613  |
| 128 | 6 | 0 | -0.636340 | -0.148926 | 2.524170  |
| 129 | 6 | 0 | -2.807718 | 0.493307  | 1.555580  |
| 130 | 6 | 0 | -4.351017 | -1.191763 | 0.404731  |
| 131 | 6 | 0 | -1.420093 | -3.520010 | 1.129574  |
| 132 | 1 | 0 | -0.342004 | -3.417895 | 1.190167  |

|     |   |   |            |           |           |
|-----|---|---|------------|-----------|-----------|
| 133 | 6 | 0 | -7.618174  | -0.539808 | -1.392229 |
| 134 | 6 | 0 | -6.223752  | 3.438574  | -0.813901 |
| 135 | 6 | 0 | -8.293932  | 2.963246  | -2.621143 |
| 136 | 1 | 0 | -9.093694  | 2.780387  | -3.324966 |
| 137 | 6 | 0 | -4.508171  | 2.575567  | 0.771608  |
| 138 | 6 | 0 | -3.572468  | -2.400804 | 0.726883  |
| 139 | 6 | 0 | -6.659157  | 2.111794  | -1.044445 |
| 140 | 6 | 0 | -9.950588  | -1.026688 | -2.920231 |
| 141 | 6 | 0 | -2.777414  | 1.680956  | 2.288671  |
| 142 | 6 | 0 | -5.196069  | 3.678014  | 0.205623  |
| 143 | 6 | 0 | -3.221757  | 4.133836  | 2.123873  |
| 144 | 1 | 0 | -2.398221  | 4.306114  | 2.800547  |
| 145 | 6 | 0 | -8.271039  | 0.523461  | -2.055304 |
| 146 | 6 | 0 | -4.200440  | -3.666155 | 0.830275  |
| 147 | 6 | 0 | -5.616565  | -3.795059 | 0.496817  |
| 148 | 6 | 0 | -9.428648  | 0.254743  | -2.799043 |
| 149 | 1 | 0 | -9.938502  | 1.071431  | -3.290535 |
| 150 | 6 | 0 | -6.249081  | -2.714657 | -0.148490 |
| 151 | 6 | 0 | -7.546984  | -2.910803 | -0.681094 |
| 152 | 6 | 0 | -3.891357  | 5.220438  | 1.579831  |
| 153 | 6 | 0 | -8.211487  | -4.110180 | -0.438347 |
| 154 | 1 | 0 | -9.231956  | -4.224252 | -0.787546 |
| 155 | 6 | 0 | -9.305237  | -2.060001 | -2.235664 |
| 156 | 1 | 0 | -9.690219  | -3.069264 | -2.331531 |
| 157 | 6 | 0 | -7.824414  | 4.261113  | -2.465036 |
| 158 | 6 | 0 | -4.894191  | 4.965096  | 0.641726  |
| 159 | 1 | 0 | -5.449270  | 5.803984  | 0.237812  |
| 160 | 6 | 0 | -6.797407  | 4.476374  | -1.542283 |
| 161 | 1 | 0 | -6.421963  | 5.485310  | -1.414659 |
| 162 | 6 | 0 | -8.382632  | 5.446502  | -3.257104 |
| 163 | 6 | 0 | -6.327085  | -4.979017 | 0.730860  |
| 164 | 1 | 0 | -5.851156  | -5.771258 | 1.292207  |
| 165 | 6 | 0 | -3.560839  | 6.666698  | 1.958269  |
| 166 | 6 | 0 | -2.088644  | 2.686980  | 4.486556  |
| 167 | 1 | 0 | -2.986702  | 3.293821  | 4.493758  |
| 168 | 6 | 0 | -11.193207 | -1.341429 | -3.757340 |
| 169 | 6 | 0 | -3.437199  | -4.807854 | 1.132738  |
| 170 | 1 | 0 | -3.918334  | -5.776052 | 1.184761  |
| 171 | 6 | 0 | 0.131084   | 1.009334  | 4.588633  |
| 172 | 1 | 0 | 0.990013   | 0.347751  | 4.628789  |
| 173 | 6 | 0 | -2.068083  | -4.741070 | 1.294931  |
| 174 | 1 | 0 | -1.497833  | -5.637683 | 1.513203  |
| 175 | 6 | 0 | -7.633538  | -5.150986 | 0.291933  |
| 176 | 6 | 0 | -1.207356  | 2.771006  | 5.538706  |
| 177 | 1 | 0 | -1.401828  | 3.464258  | 6.350568  |
| 178 | 6 | 0 | -8.448397  | -6.414350 | 0.578912  |
| 179 | 6 | 0 | -0.064660  | 1.949041  | 5.571428  |
| 180 | 1 | 0 | 0.645105   | 2.036468  | 6.387436  |

|     |   |   |            |           |           |
|-----|---|---|------------|-----------|-----------|
| 181 | 6 | 0 | -9.512555  | 5.030162  | -4.204062 |
| 182 | 1 | 0 | -9.169138  | 4.300400  | -4.944026 |
| 183 | 1 | 0 | -9.876933  | 5.907918  | -4.745971 |
| 184 | 1 | 0 | -10.358219 | 4.600080  | -3.657783 |
| 185 | 6 | 0 | -7.253259  | 6.067711  | -4.096556 |
| 186 | 1 | 0 | -6.431491  | 6.422726  | -3.468080 |
| 187 | 1 | 0 | -7.633302  | 6.921669  | -4.667326 |
| 188 | 1 | 0 | -6.846165  | 5.335660  | -4.800316 |
| 189 | 6 | 0 | -11.784356 | -0.089305 | -4.413141 |
| 190 | 1 | 0 | -12.099461 | 0.646410  | -3.666179 |
| 191 | 1 | 0 | -12.665061 | -0.366413 | -4.999925 |
| 192 | 1 | 0 | -11.068607 | 0.386926  | -5.090729 |
| 193 | 6 | 0 | -8.892801  | -7.051457 | -0.747980 |
| 194 | 1 | 0 | -9.516294  | -6.371106 | -1.334950 |
| 195 | 1 | 0 | -9.477389  | -7.956687 | -0.552598 |
| 196 | 1 | 0 | -8.025852  | -7.324966 | -1.356662 |
| 197 | 6 | 0 | -7.644435  | -7.453918 | 1.366037  |
| 198 | 1 | 0 | -6.755347  | -7.775693 | 0.814336  |
| 199 | 1 | 0 | -8.264605  | -8.337349 | 1.544705  |
| 200 | 1 | 0 | -7.328238  | -7.066578 | 2.339650  |
| 201 | 6 | 0 | -8.934000  | 6.500417  | -2.282269 |
| 202 | 1 | 0 | -9.736622  | 6.079237  | -1.669499 |
| 203 | 1 | 0 | -9.335387  | 7.353538  | -2.839281 |
| 204 | 1 | 0 | -8.157094  | 6.875120  | -1.609785 |
| 205 | 6 | 0 | -4.823807  | 7.352383  | 2.506126  |
| 206 | 1 | 0 | -5.630163  | 7.371294  | 1.767760  |
| 207 | 1 | 0 | -4.598338  | 8.388082  | 2.780884  |
| 208 | 1 | 0 | -5.192516  | 6.831904  | 3.395065  |
| 209 | 6 | 0 | -2.470425  | 6.749000  | 3.031562  |
| 210 | 1 | 0 | -2.765777  | 6.226232  | 3.947340  |
| 211 | 1 | 0 | -2.287481  | 7.797202  | 3.286223  |
| 212 | 1 | 0 | -1.524321  | 6.322674  | 2.683600  |
| 213 | 6 | 0 | -9.689641  | -6.034799 | 1.404697  |
| 214 | 1 | 0 | -9.396840  | -5.570985 | 2.351407  |
| 215 | 1 | 0 | -10.283094 | -6.928008 | 1.626618  |
| 216 | 1 | 0 | -10.329812 | -5.329305 | 0.867392  |
| 217 | 6 | 0 | -3.072431  | 7.416782  | 0.707762  |
| 218 | 1 | 0 | -2.173401  | 6.944846  | 0.299502  |
| 219 | 1 | 0 | -2.834429  | 8.456274  | 0.957213  |
| 220 | 1 | 0 | -3.833881  | 7.423750  | -0.077690 |
| 221 | 6 | 0 | -10.814953 | -2.335825 | -4.867908 |
| 222 | 1 | 0 | -10.051574 | -1.909762 | -5.525726 |
| 223 | 1 | 0 | -11.695244 | -2.578710 | -5.472441 |
| 224 | 1 | 0 | -10.421862 | -3.269833 | -4.456813 |
| 225 | 6 | 0 | -12.270622 | -1.967421 | -2.855784 |
| 226 | 1 | 0 | -11.922477 | -2.897969 | -2.398574 |
| 227 | 1 | 0 | -13.166716 | -2.196711 | -3.441927 |
| 228 | 1 | 0 | -12.550339 | -1.280485 | -2.051404 |

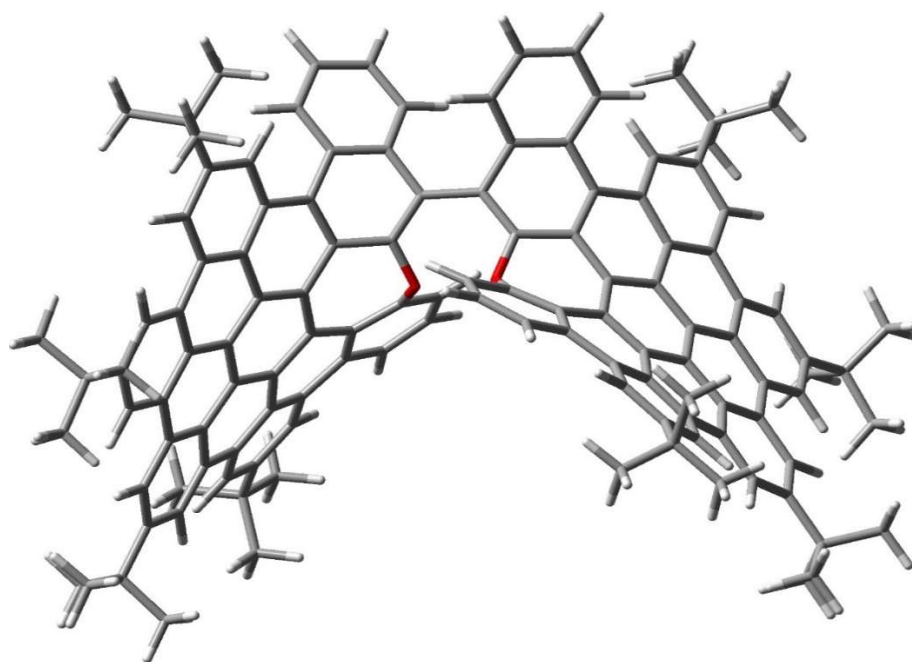

**Figure S19.** DFT optimized structure of *TS*.

**Table S5.** Optimized energy and Atomic coordinates for the DFT calculated structure of *TS*:

|                                              |                             |
|----------------------------------------------|-----------------------------|
| Zero-point correction=                       | 1.911480 (Hartree/Particle) |
| Thermal correction to Energy=                | 2.012884                    |
| Thermal correction to Enthalpy=              | 2.013828                    |
| Thermal correction to Gibbs Free Energy=     | 1.776243                    |
| Sum of electronic and zero-point Energies=   | -4933.643609                |
| Sum of electronic and thermal Energies=      | -4933.542204                |
| Sum of electronic and thermal Enthalpies=    | -4933.541260                |
| Sum of electronic and thermal Free Energies= | -4933.778845                |

| Center Number | Atomic Number | Atomic Type | Coordinates (Angstroms) |           |           |
|---------------|---------------|-------------|-------------------------|-----------|-----------|
|               |               |             | X                       | Y         | Z         |
| 1             | 8             | 0           | 0.853897                | 1.131910  | 0.758094  |
| 2             | 6             | 0           | 1.465266                | 2.326589  | 0.510316  |
| 3             | 6             | 0           | 2.908444                | 4.672968  | 0.322221  |
| 4             | 6             | 0           | 0.932618                | 0.761798  | 2.080924  |
| 5             | 6             | 0           | 5.710712                | -0.233660 | 0.218323  |
| 6             | 6             | 0           | 5.369186                | -1.182528 | 1.189209  |
| 7             | 6             | 0           | 4.918142                | 0.934051  | 0.072981  |
| 8             | 6             | 0           | 1.501714                | 4.686050  | 0.504791  |
| 9             | 6             | 0           | 7.568571                | -1.671162 | -0.582235 |
| 10            | 6             | 0           | 3.659943                | 1.039838  | 0.717034  |
| 11            | 6             | 0           | 4.219696                | -0.977617 | 1.996241  |
| 12            | 6             | 0           | 5.937848                | -3.241124 | 2.436781  |
| 13            | 6             | 0           | 4.816927                | 3.289706  | -0.677190 |

|    |   |   |           |           |           |
|----|---|---|-----------|-----------|-----------|
| 14 | 6 | 0 | 0.734947  | 3.471123  | 0.211413  |
| 15 | 6 | 0 | 2.900384  | 2.271284  | 0.465512  |
| 16 | 6 | 0 | 3.303155  | 0.052324  | 1.693738  |
| 17 | 6 | 0 | -0.186925 | 0.938959  | 2.867874  |
| 18 | 1 | 0 | -1.046505 | 1.447590  | 2.443677  |
| 19 | 6 | 0 | 6.187134  | -2.358790 | 1.364958  |
| 20 | 6 | 0 | 7.267239  | 0.549613  | -1.546414 |
| 21 | 6 | 0 | 8.598428  | -1.897877 | -1.504905 |
| 22 | 1 | 0 | 9.127166  | -2.840240 | -1.480889 |
| 23 | 6 | 0 | 5.439472  | 2.021351  | -0.720405 |
| 24 | 6 | 0 | 2.095666  | 0.117924  | 2.524925  |
| 25 | 6 | 0 | 6.863859  | -0.447272 | -0.626596 |
| 26 | 6 | 0 | 7.626139  | -4.781737 | 1.591031  |
| 27 | 6 | 0 | 3.562845  | 3.415305  | 0.029723  |
| 28 | 6 | 0 | 6.612277  | 1.861045  | -1.498507 |
| 29 | 6 | 0 | 5.334579  | 4.345891  | -1.447010 |
| 30 | 1 | 0 | 4.783116  | 5.274956  | -1.480407 |
| 31 | 6 | 0 | 7.227077  | -2.654517 | 0.450069  |
| 32 | 6 | 0 | 2.029079  | -0.521259 | 3.783412  |
| 33 | 6 | 0 | 3.080434  | -1.470995 | 4.151857  |
| 34 | 6 | 0 | 7.916802  | -3.860727 | 0.584999  |
| 35 | 1 | 0 | 8.706977  | -4.103999 | -0.115335 |
| 36 | 6 | 0 | 4.063249  | -1.792185 | 3.186801  |
| 37 | 6 | 0 | 4.956622  | -2.853580 | 3.453069  |
| 38 | 6 | 0 | 6.497888  | 4.206063  | -2.188987 |
| 39 | 6 | 0 | 4.915588  | -3.496426 | 4.694300  |
| 40 | 1 | 0 | 5.647237  | -4.265301 | 4.903439  |
| 41 | 6 | 0 | 6.641387  | -4.445725 | 2.515732  |
| 42 | 1 | 0 | 6.393508  | -5.144053 | 3.304064  |
| 43 | 6 | 0 | 8.958957  | -0.955158 | -2.459253 |
| 44 | 6 | 0 | 7.129250  | 2.958133  | -2.181945 |
| 45 | 1 | 0 | 8.061004  | 2.848290  | -2.725452 |
| 46 | 6 | 0 | 8.284262  | 0.267736  | -2.453653 |
| 47 | 1 | 0 | 8.551781  | 1.010340  | -3.197126 |
| 48 | 6 | 0 | 10.058706 | -1.201179 | -3.496189 |
| 49 | 6 | 0 | 3.086796  | -2.131171 | 5.380227  |
| 50 | 1 | 0 | 2.361017  | -1.853290 | 6.135541  |
| 51 | 6 | 0 | 7.108668  | 5.354683  | -2.995409 |
| 52 | 6 | 0 | 3.661080  | 5.824512  | 0.654807  |
| 53 | 1 | 0 | 4.741128  | 5.788441  | 0.567371  |
| 54 | 6 | 0 | 8.399851  | -6.102621 | 1.647480  |
| 55 | 6 | 0 | 0.893303  | -0.334938 | 4.590423  |
| 56 | 1 | 0 | 0.832954  | -0.816077 | 5.558328  |
| 57 | 6 | 0 | 0.928164  | 5.816704  | 1.130354  |
| 58 | 1 | 0 | -0.120567 | 5.799174  | 1.395384  |
| 59 | 6 | 0 | -0.188626 | 0.407614  | 4.156476  |
| 60 | 1 | 0 | -1.057825 | 0.526701  | 4.794572  |
| 61 | 6 | 0 | 4.003305  | -3.138326 | 5.681268  |

|     |   |   |           |           |           |
|-----|---|---|-----------|-----------|-----------|
| 62  | 6 | 0 | 3.060357  | 6.939189  | 1.194904  |
| 63  | 1 | 0 | 3.661513  | 7.797664  | 1.475595  |
| 64  | 6 | 0 | 3.964221  | -3.806206 | 7.058603  |
| 65  | 6 | 0 | 1.683059  | 6.921274  | 1.458447  |
| 66  | 1 | 0 | 1.211275  | 7.761595  | 1.957217  |
| 67  | 6 | 0 | 10.697869 | -2.585536 | -3.347735 |
| 68  | 1 | 0 | 9.962200  | -3.384884 | -3.481752 |
| 69  | 1 | 0 | 11.472278 | -2.713451 | -4.109739 |
| 70  | 1 | 0 | 11.170682 | -2.708174 | -2.368073 |
| 71  | 6 | 0 | 9.455599  | -1.096119 | -4.907203 |
| 72  | 1 | 0 | 9.017949  | -0.109955 | -5.086382 |
| 73  | 1 | 0 | 10.231074 | -1.262279 | -5.662325 |
| 74  | 1 | 0 | 8.669778  | -1.844039 | -5.048694 |
| 75  | 6 | 0 | 7.940298  | -6.994844 | 2.804791  |
| 76  | 1 | 0 | 6.881636  | -7.257984 | 2.714636  |
| 77  | 1 | 0 | 8.517465  | -7.924173 | 2.799595  |
| 78  | 1 | 0 | 8.096854  | -6.511158 | 3.774263  |
| 79  | 6 | 0 | 5.034903  | -4.892118 | 7.206691  |
| 80  | 1 | 0 | 6.043298  | -4.480903 | 7.096645  |
| 81  | 1 | 0 | 4.963372  | -5.341089 | 8.201769  |
| 82  | 1 | 0 | 4.902745  | -5.690512 | 6.469540  |
| 83  | 6 | 0 | 2.586012  | -4.456566 | 7.268301  |
| 84  | 1 | 0 | 2.394139  | -5.212999 | 6.501492  |
| 85  | 1 | 0 | 2.542665  | -4.940528 | 8.249806  |
| 86  | 1 | 0 | 1.780139  | -3.718703 | 7.222455  |
| 87  | 6 | 0 | 11.160763 | -0.140695 | -3.330965 |
| 88  | 1 | 0 | 11.602694 | -0.194428 | -2.331509 |
| 89  | 1 | 0 | 11.953475 | -0.302514 | -4.068932 |
| 90  | 1 | 0 | 10.771497 | 0.871378  | -3.473907 |
| 91  | 6 | 0 | 8.504601  | 5.672330  | -2.432762 |
| 92  | 1 | 0 | 9.170793  | 4.806742  | -2.491438 |
| 93  | 1 | 0 | 8.963418  | 6.489390  | -2.999624 |
| 94  | 1 | 0 | 8.438670  | 5.975375  | -1.383442 |
| 95  | 6 | 0 | 6.258172  | 6.626743  | -2.923319 |
| 96  | 1 | 0 | 6.152071  | 6.985072  | -1.894220 |
| 97  | 1 | 0 | 6.738137  | 7.419644  | -3.504649 |
| 98  | 1 | 0 | 5.257801  | 6.466459  | -3.337550 |
| 99  | 6 | 0 | 4.198854  | -2.744057 | 8.145807  |
| 100 | 1 | 0 | 3.437553  | -1.959705 | 8.113015  |
| 101 | 1 | 0 | 4.163876  | -3.206322 | 9.138053  |
| 102 | 1 | 0 | 5.176846  | -2.270351 | 8.019305  |
| 103 | 6 | 0 | 7.235093  | 4.940935  | -4.470952 |
| 104 | 1 | 0 | 6.254035  | 4.701845  | -4.892130 |
| 105 | 1 | 0 | 7.671647  | 5.758120  | -5.054858 |
| 106 | 1 | 0 | 7.877326  | 4.063719  | -4.591157 |
| 107 | 6 | 0 | 9.898058  | -5.807869 | 1.831697  |
| 108 | 1 | 0 | 10.073576 | -5.261011 | 2.762923  |
| 109 | 1 | 0 | 10.464044 | -6.744620 | 1.869409  |

|     |   |   |           |           |           |
|-----|---|---|-----------|-----------|-----------|
| 110 | 1 | 0 | 10.296233 | -5.208295 | 1.008258  |
| 111 | 6 | 0 | 8.188058  | -6.872037 | 0.332873  |
| 112 | 1 | 0 | 8.546121  | -6.303102 | -0.529811 |
| 113 | 1 | 0 | 8.733445  | -7.821373 | 0.359500  |
| 114 | 1 | 0 | 7.126856  | -7.087470 | 0.176850  |
| 115 | 8 | 0 | -0.841201 | 1.189441  | -0.896729 |
| 116 | 6 | 0 | -1.432696 | 2.371642  | -0.558440 |
| 117 | 6 | 0 | -2.841647 | 4.722132  | -0.218379 |
| 118 | 6 | 0 | -0.985328 | 0.884229  | -2.231338 |
| 119 | 6 | 0 | -5.683958 | -0.166192 | -0.209544 |
| 120 | 6 | 0 | -5.390314 | -1.076253 | -1.230194 |
| 121 | 6 | 0 | -4.878038 | 0.992481  | -0.051825 |
| 122 | 6 | 0 | -1.439363 | 4.725528  | -0.428677 |
| 123 | 6 | 0 | -7.509075 | -1.630396 | 0.614628  |
| 124 | 6 | 0 | -3.647240 | 1.116037  | -0.740768 |
| 125 | 6 | 0 | -4.274319 | -0.844125 | -2.077379 |
| 126 | 6 | 0 | -6.020970 | -3.084731 | -2.531808 |
| 127 | 6 | 0 | -4.732902 | 3.316533  | 0.781525  |
| 128 | 6 | 0 | -0.682808 | 3.489040  | -0.208145 |
| 129 | 6 | 0 | -2.867304 | 2.330006  | -0.470235 |
| 130 | 6 | 0 | -3.338954 | 0.165854  | -1.771543 |
| 131 | 6 | 0 | 0.096115  | 1.095536  | -3.061195 |
| 132 | 1 | 0 | 0.976156  | 1.583507  | -2.655455 |
| 133 | 6 | 0 | -6.220854 | -2.242564 | -1.413863 |
| 134 | 6 | 0 | -7.161418 | 0.554488  | 1.646296  |
| 135 | 6 | 0 | -8.500723 | -1.888626 | 1.571696  |
| 136 | 1 | 0 | -9.034128 | -2.827922 | 1.535580  |
| 137 | 6 | 0 | -5.361391 | 2.050531  | 0.801662  |
| 138 | 6 | 0 | -2.169837 | 0.262287  | -2.650510 |
| 139 | 6 | 0 | -6.800079 | -0.409107 | 0.674424  |
| 140 | 6 | 0 | -7.665114 | -4.660248 | -1.656804 |
| 141 | 6 | 0 | -3.503341 | 3.460041  | 0.036947  |
| 142 | 6 | 0 | -6.503945 | 1.865754  | 1.618771  |
| 143 | 6 | 0 | -5.216680 | 4.346764  | 1.607338  |
| 144 | 1 | 0 | -4.660010 | 5.272176  | 1.653218  |
| 145 | 6 | 0 | -7.213927 | -2.574189 | -0.466074 |
| 146 | 6 | 0 | -2.164465 | -0.321602 | -3.937678 |
| 147 | 6 | 0 | -3.235015 | -1.251604 | -4.297303 |
| 148 | 6 | 0 | -7.910300 | -3.783348 | -0.607867 |
| 149 | 1 | 0 | -8.658608 | -4.048696 | 0.125599  |
| 150 | 6 | 0 | -4.173895 | -1.607419 | -3.307195 |
| 151 | 6 | 0 | -5.088352 | -2.654344 | -3.578433 |
| 152 | 6 | 0 | -6.351155 | 4.184036  | 2.387666  |
| 153 | 6 | 0 | -5.105591 | -3.236272 | -4.842461 |
| 154 | 1 | 0 | -5.851280 | -3.993357 | -5.060377 |
| 155 | 6 | 0 | -6.723766 | -4.281476 | -2.618429 |
| 156 | 1 | 0 | -6.517932 | -4.955724 | -3.442868 |
| 157 | 6 | 0 | -8.817689 | -0.980557 | 2.573310  |



|     |   |   |            |           |           |
|-----|---|---|------------|-----------|-----------|
| 158 | 6 | 0 | -6.988458  | 2.938847  | 2.360873  |
| 159 | 1 | 0 | -7.898467  | 2.812427  | 2.936824  |
| 160 | 6 | 0 | -8.140107  | 0.241444  | 2.584024  |
| 161 | 1 | 0 | -8.374371  | 0.956978  | 3.364367  |
| 162 | 6 | 0 | -9.875250  | -1.261391 | 3.644607  |
| 163 | 6 | 0 | -3.295803  | -1.859978 | -5.557875 |
| 164 | 1 | 0 | -2.599942  | -1.548895 | -6.324491 |
| 165 | 6 | 0 | -6.924412  | 5.304474  | 3.258799  |
| 166 | 6 | 0 | -3.584858  | 5.896440  | -0.483794 |
| 167 | 1 | 0 | -4.663356  | 5.870028  | -0.375003 |
| 168 | 6 | 0 | -8.381038  | -6.006412 | -1.799653 |
| 169 | 6 | 0 | -1.066629  | -0.098814 | -4.788113 |
| 170 | 1 | 0 | -1.053023  | -0.533642 | -5.779398 |
| 171 | 6 | 0 | -0.860585  | 5.875818  | -1.011535 |
| 172 | 1 | 0 | 0.184471   | 5.856942  | -1.292004 |
| 173 | 6 | 0 | 0.035585   | 0.623026  | -4.371772 |
| 174 | 1 | 0 | 0.873489   | 0.772057  | -5.044424 |
| 175 | 6 | 0 | -4.231223  | -2.841803 | -5.858007 |
| 176 | 6 | 0 | -2.978989  | 7.026083  | -0.986349 |
| 177 | 1 | 0 | -3.573372  | 7.903572  | -1.218491 |
| 178 | 6 | 0 | -4.333604  | -3.500767 | -7.235960 |
| 179 | 6 | 0 | -1.606797  | 7.003207  | -1.275735 |
| 180 | 1 | 0 | -1.133552  | 7.859831  | -1.744497 |
| 181 | 6 | 0 | -10.519767 | -2.641086 | 3.476886  |
| 182 | 1 | 0 | -9.779185  | -3.443308 | 3.555974  |
| 183 | 1 | 0 | -11.263787 | -2.794493 | 4.264029  |
| 184 | 1 | 0 | -11.030514 | -2.733272 | 2.513044  |
| 185 | 6 | 0 | -9.217295  | -1.201562 | 5.033444  |
| 186 | 1 | 0 | -8.773437  | -0.221035 | 5.227655  |
| 187 | 1 | 0 | -9.962821  | -1.393364 | 5.812349  |
| 188 | 1 | 0 | -8.426376  | -1.952518 | 5.120168  |
| 189 | 6 | 0 | -9.141419  | -6.043251 | -3.135958 |
| 190 | 1 | 0 | -8.466900  | -5.919804 | -3.988049 |
| 191 | 1 | 0 | -9.653792  | -7.004205 | -3.251134 |
| 192 | 1 | 0 | -9.889198  | -5.245686 | -3.179217 |
| 193 | 6 | 0 | -5.734249  | -3.244251 | -7.817296 |
| 194 | 1 | 0 | -5.916050  | -2.171209 | -7.929453 |
| 195 | 1 | 0 | -5.826350  | -3.714709 | -8.801944 |
| 196 | 1 | 0 | -6.518775  | -3.653217 | -7.174416 |
| 197 | 6 | 0 | -4.108908  | -5.015431 | -7.092095 |
| 198 | 1 | 0 | -4.853000  | -5.472456 | -6.433473 |
| 199 | 1 | 0 | -4.181608  | -5.502547 | -8.070285 |
| 200 | 1 | 0 | -3.118278  | -5.221874 | -6.675876 |
| 201 | 6 | 0 | -10.982521 | -0.197381 | 3.557120  |
| 202 | 1 | 0 | -11.461400 | -0.217113 | 2.573480  |
| 203 | 1 | 0 | -11.747804 | -0.384469 | 4.317781  |
| 204 | 1 | 0 | -10.587910 | 0.809753  | 3.719499  |
| 205 | 6 | 0 | -8.338655  | 5.649041  | 2.761650  |

|     |   |   |            |           |           |
|-----|---|---|------------|-----------|-----------|
| 206 | 1 | 0 | -9.006221  | 4.783905  | 2.810712  |
| 207 | 1 | 0 | -8.771862  | 6.444357  | 3.377435  |
| 208 | 1 | 0 | -8.309999  | 5.993325  | 1.723468  |
| 209 | 6 | 0 | -6.069495  | 6.574357  | 3.202213  |
| 210 | 1 | 0 | -5.999021  | 6.969948  | 2.183833  |
| 211 | 1 | 0 | -6.522572  | 7.347292  | 3.830139  |
| 212 | 1 | 0 | -5.055596  | 6.393751  | 3.573019  |
| 213 | 6 | 0 | -3.296135  | -2.951679 | -8.220320 |
| 214 | 1 | 0 | -2.274332  | -3.132456 | -7.871637 |
| 215 | 1 | 0 | -3.411814  | -3.449530 | -9.187594 |
| 216 | 1 | 0 | -3.423794  | -1.876465 | -8.380943 |
| 217 | 6 | 0 | -6.997316  | 4.836035  | 4.721669  |
| 218 | 1 | 0 | -6.003140  | 4.572226  | 5.094520  |
| 219 | 1 | 0 | -7.402249  | 5.633880  | 5.353072  |
| 220 | 1 | 0 | -7.643358  | 3.960587  | 4.834044  |
| 221 | 6 | 0 | -9.383910  | -6.254918 | -0.668994 |
| 222 | 1 | 0 | -10.172106 | -5.495280 | -0.654066 |
| 223 | 1 | 0 | -9.861751  | -7.228392 | -0.813164 |
| 224 | 1 | 0 | -8.892473  | -6.265831 | 0.309092  |
| 225 | 6 | 0 | -7.336832  | -7.135514 | -1.774769 |
| 226 | 1 | 0 | -6.780436  | -7.127158 | -0.832790 |
| 227 | 1 | 0 | -7.829849  | -8.108096 | -1.876531 |
| 228 | 1 | 0 | -6.616144  | -7.037254 | -2.591451 |

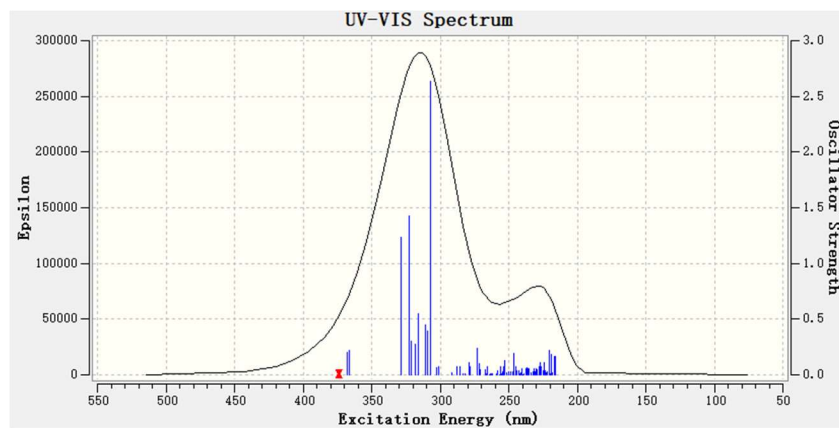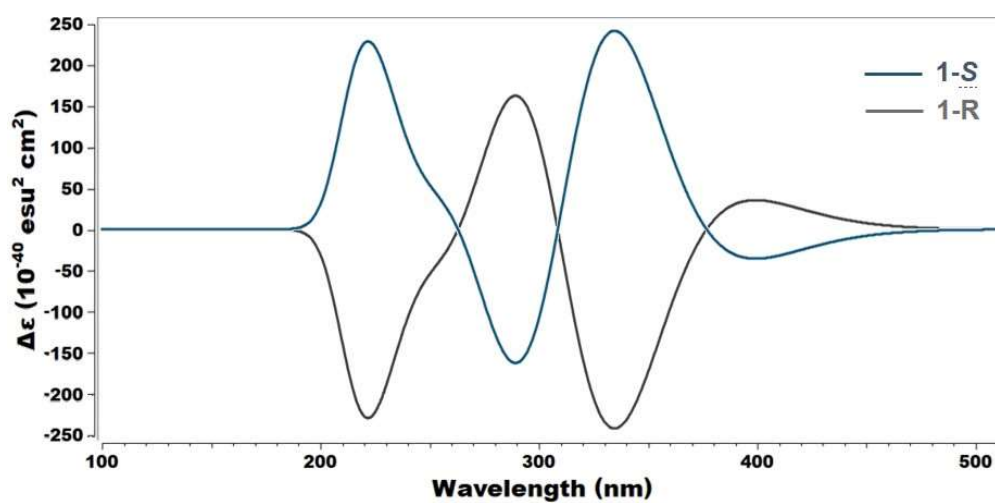

Figure S20. Calculated UV-vis spectrum of **1** (a) and ECD spectra of **1-R** and **1-S** (b).

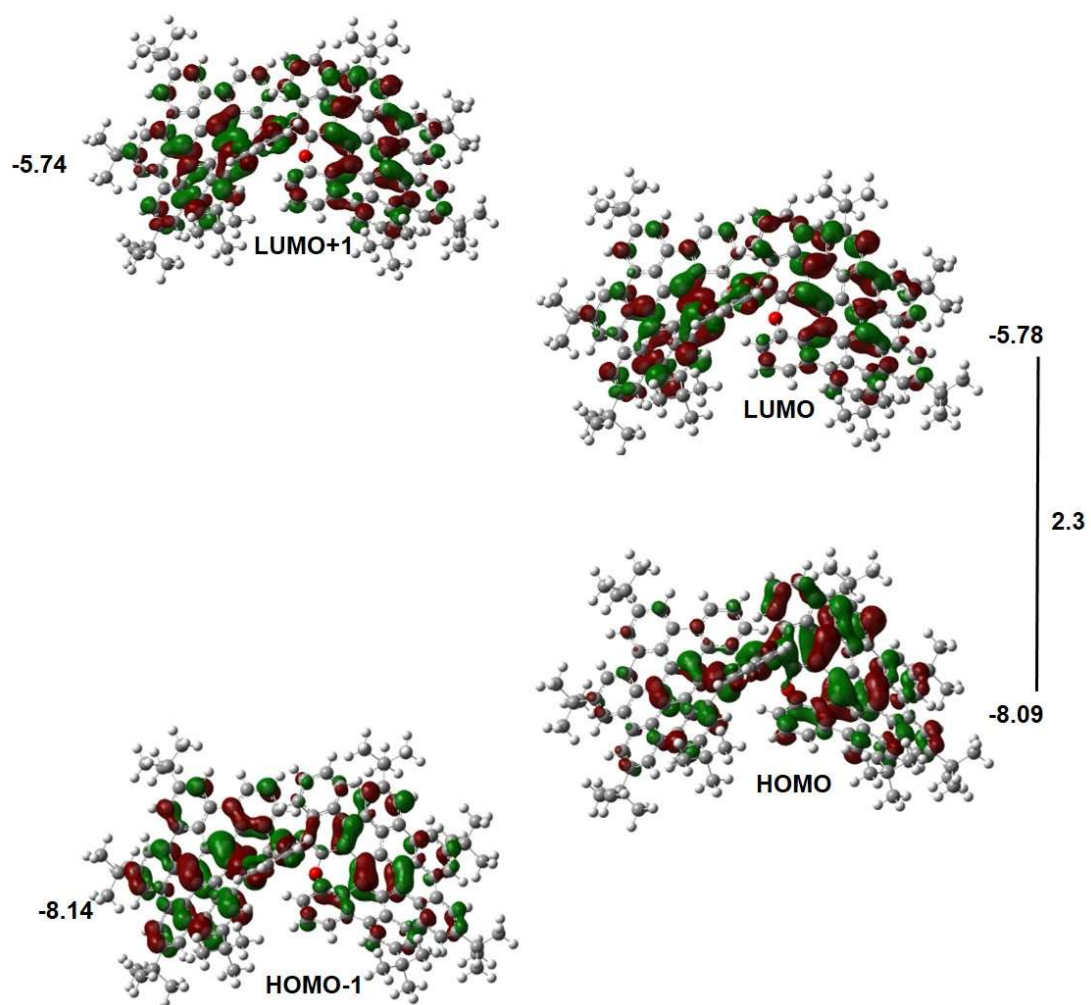

**Figure S21.** DFT calculated molecular orbitals (from HOMO-1 to LUMO+1) of compound **1** with energies.

**Table S6.** Major transitions of **1** calculated by TD-DFT.

| Excited state | Energy (eV) | Wavelength (nm) | oscillator strength (f) | Description |          |
|---------------|-------------|-----------------|-------------------------|-------------|----------|
| 1             | 3.3158      | 373.92          | 0.0210                  | H-3 -> L    | 0.21139  |
|               |             |                 |                         | H-3 -> L+1  | 0.26901  |
|               |             |                 |                         | H-2 -> L    | 0.21161  |
|               |             |                 |                         | H-2 -> L+1  | 0.22486  |
|               |             |                 |                         | H-1 -> L+3  | -0.19561 |
|               |             |                 |                         | H -> L+1    | 0.13112  |
|               |             |                 |                         | H -> L+3    | 0.36805  |
| 2             | 3.3229      | 373.12          | 0.0066                  | H-3 -> L    | 0.24717  |
|               |             |                 |                         | H-3 -> L+1  | -0.18951 |
|               |             |                 |                         | H-2 -> L    | -0.27862 |
|               |             |                 |                         | H-2 -> L+1  | 0.23720  |
|               |             |                 |                         | H-1 -> L+2  | 0.37430  |
|               |             |                 |                         | H -> L+2    | 0.21626  |
| 3             | 3.3744      | 367.43          | 0.1983                  | H-3 -> L+3  | -0.17695 |
|               |             |                 |                         | H-2 -> L+3  | -0.15282 |
|               |             |                 |                         | H-1 -> L    | -0.21952 |
|               |             |                 |                         | H-1 -> L+1  | -0.17198 |
|               |             |                 |                         | H -> L      | 0.33642  |
|               |             |                 |                         | H -> L+1    | 0.41538  |
|               |             |                 |                         | H -> L+3    | -0.10436 |
| 4             | 3.3831      | 366.48          | 0.2162                  | H-3 -> L+2  | -0.17049 |
|               |             |                 |                         | H-2 -> L+2  | 0.19399  |
|               |             |                 |                         | H-1 -> L    | 0.40170  |
|               |             |                 |                         | H-1 -> L+1  | -0.33619 |
|               |             |                 |                         | H -> L      | 0.27911  |
|               |             |                 |                         | H -> L+1    | -0.16957 |
| 5             | 3.7728      | 328.62          | 1.2362                  | H-7 -> L    | 0.11995  |
|               |             |                 |                         | H-5 -> L+1  | 0.15310  |
|               |             |                 |                         | H-4 -> L    | -0.23398 |
|               |             |                 |                         | H-3 -> L+1  | -0.11336 |
|               |             |                 |                         | H-2 -> L    | -0.16259 |
|               |             |                 |                         | H-1 -> L+4  | 0.10767  |
|               |             |                 |                         | H-1 -> L+5  | 0.23541  |
|               |             |                 |                         | H -> L+4    | 0.37322  |
|               |             |                 |                         | H -> L+5    | -0.12040 |
| H -> L+6      | -0.10616    |                 |                         |             |          |
| 6             | 3.8454      | 322.42          | 1.4257                  | H-3 -> L+1  | 0.22046  |
|               |             |                 |                         | H-2 -> L    | 0.26810  |

|   |        |        |        |            |          |
|---|--------|--------|--------|------------|----------|
|   |        |        |        | H-1 -> L+2 | 0.21161  |
|   |        |        |        | H-1 -> L+3 | 0.10830  |
|   |        |        |        | H-1 -> L+5 | 0.13171  |
|   |        |        |        | H -> L+2   | 0.13523  |
|   |        |        |        | H -> L+4   | 0.17922  |
| 7 | 3.8567 | 321.47 | 0.3038 | H-3 -> L   | -0.16237 |
|   |        |        |        | H-2 -> L+1 | -0.14208 |
|   |        |        |        | H-2 -> L+2 | 0.11777  |
|   |        |        |        | H-1 -> L+2 | 0.13817  |
|   |        |        |        | H-1 -> L+3 | -0.15794 |
|   |        |        |        | H-1 -> L+4 | 0.30682  |
|   |        |        |        | H -> L+2   | 0.12881  |
|   |        |        |        | H -> L+3   | 0.25440  |
|   |        |        |        | H -> L+5   | 0.27149  |
| 8 | 3.9008 | 317.84 | 0.2758 | H-6 -> L   | 0.12140  |
|   |        |        |        | H-6 -> L+1 | 0.12436  |
|   |        |        |        | H-5 -> L   | -0.11560 |
|   |        |        |        | H-5 -> L+1 | -0.11540 |
|   |        |        |        | H-4 -> L+1 | 0.20087  |
|   |        |        |        | H-4 -> L+2 | 0.10928  |
|   |        |        |        | H-3-> L+1  | -0.12362 |
|   |        |        |        | H-3 -> L+3 | 0.22837  |
|   |        |        |        | H-3 ->L+4  | -0.11646 |
|   |        |        |        | H-3 -> L+5 | 0.11648  |
|   |        |        |        | H-2 -> L+3 | 0.20510  |
|   |        |        |        | H-2 -> L+4 | -0.10817 |
|   |        |        |        | H-> L+3    | 0.10476  |
|   |        |        |        | H -> L+4   | 0.10886  |
|   |        |        |        | H ->L+8    | -0.11126 |
| 9 | 3.9212 | 316.19 | 0.5501 | H-7 -> L   | 0.10807  |
|   |        |        |        | H-5 -> L   | -0.17676 |
|   |        |        |        | H-5 -> L+1 | 0.12307  |
|   |        |        |        | H-5 -> L+2 | 0.10931  |
|   |        |        |        | H-4 -> L   | -0.13606 |
|   |        |        |        | H-4 -> L+1 | 0.14559  |
|   |        |        |        | H-3-> L+1  | 0.11797  |
|   |        |        |        | H-3 -> L+2 | -0.19786 |
|   |        |        |        | H-3 ->L+4  | -0.13790 |
|   |        |        |        | H-2 -> L+2 | 0.24134  |
|   |        |        |        | H-2 -> L+4 | 0.16302  |
|   |        |        |        | H -> L+4   | -0.13001 |

## Reference:

- [S1] R. Kotani *et al*, Controlling the S1 Energy Profile by Tuning Excited-State Aromaticity. *J. Am. Chem. Soc.* **2020**, *142*, 14985;
- [S2] Jia, X. *et al*, Design and Applications of a SO<sub>2</sub> Surrogate in Palladium-Catalyzed Direct Aminosulfonylation between Aryl Iodides and Amines. *Angew. Chem. Int. Ed.* **2021**, *60*, 7353.
- [S3] R. H. Martin *et al*, Thermal Racemisation of Hepta-, Octa-, and Nonahelicene: Kinetic Results, Reaction Path and Experimental Proofs that the Racemisation of Hexa- and Heptahelicene Does not Involve an Intramolecular Double Diels-Alder Reaction. *Tetrahedron* **1974**, *30*, 347.
- [S4] Z.-X. Chen *et al*, Interfering with Lactate-Fueled Respiration for Enhanced Photodynamic Tumor Therapy by a Porphyrinic MOF Nanoplatform *Adv. Funct. Mater.* **2018**, *28*,1803498.
- [S5] (a) J. Feng *et al*, An Intelligent ZIF-8-Gated Polydopamine Nanoplatform for In Vivo Cooperatively Enhanced Combination Phototherapy *Chem. Sci.*, **2020**, *11*, 1649; (b) T. Sun *et al*, Protein-Assisted Synthesis of Nanoscale Covalent Organic Frameworks for Phototherapy of Cancer *Mater. Chem. Front*, **2020**, *4*, 2346.
- [S6] M. J. Frisch, G. W. Trucks, H. B. Schlegel, G. E. Scuseria, M. A. Robb, J. R. Cheeseman, G. Scalmani, V. Barone, B. Mennucci, G. A. Petersson, H. Nakatsuji, M. Caricato, X. Li, H. P. Hratchian, A. F. Izmaylov, J. Bloino, G. Zheng, J. L. Sonnenberg, M. Hada, M. Ehara, K. Toyota, R. Fukuda, J. Hasegawa, M. Ishida, T. Nakajima, Y. Honda, O. Kitao, H. Nakai, T. Vreven, J. A. Montgomery, Jr., J. E. Peralta, F. Ogliaro, M. Bearpark, J. J. Heyd, E. Brothers, K. N. Kudin, V. N. Staroverov, T. Keith, R. Kobayashi, J. Normand, K. Raghavachari, A. Rendell, J. C. Burant, S. S. Iyengar, J. Tomasi, M. Cossi, N. Rega, J. M. Millam, M. Klene, J. E. Knox, J. B. Cross, V. Bakken, C. Adamo, J. Jaramillo, R. Gomperts, R. E. Stratmann, O. Yazyev, A. J. Austin, R. Cammi, C. Pomelli, J. W. Ochterski, R. L. Martin, K. Morokuma, V. G. Zakrzewski, G. A. Voth, P. Salvador, J. J. Dannenberg, S. Dapprich, A. D. Daniels, O. Farkas, J. B. Foresman, J. V. Ortiz, J. Cioslowski, D. J. Fox, Gaussian 09, Revision B.01, Gaussian, Inc., Wallingford CT, **2010**.
- [S7] Parr, R. G.; Yang, W. *Density-functional Theory of Atoms and Molecules*; Oxford University Press: New York,1989.
